# Supplementary material for: Impulsive Signals Produced by Earthquakes in Italy and Their Potential Relation with Site Effects and Structural Damage
Source: MDPI journal article supplement (doi:10.3390/geosciences11060261), 2021-06-21

# 1 Earthquake List

| ITACA_ID               | Date                | Event name                    | Latitude | Longitude | Depth [Km] | ML  | MW   | Strike | Dip | Rake |
|------------------------|---------------------|-------------------------------|----------|-----------|------------|-----|------|--------|-----|------|
| IT-1976-0002           | 1976-05-06 20:00:12 | FRIULLI_1ST_SHOCK             | 46.262   | 13.3      | 5.7        | 6.4 | 6.4  | 290    | 30  | 105  |
| IT-1976-0005           | 1976-05-09 00:53:44 | FRIULI                        | 46.213   | 13.323    | 13.3       | 5.5 | 5.1  | 310    | 50  | 119  |
| IT-1976-0007           | 1976-05-11 22:44:00 | NORTHERN_ITALY                | 46.234   | 13.054    | 12.3       | 5.3 | 5    | 283    | 35  | 123  |
| IT-1976-0017           | 1976-06-17 14:28:47 | NORTHERN_ITALY                | 46.15    | 12.891    | 9.5        | 4.5 | 5.2  | 305    | 60  | 139  |
| IT-1976-0024           | 1976-09-11 16:31:10 | FRIULI                        | 46.275   | 13.198    | 9.8        | 5.5 | 5.2  | 271    | 38  | 116  |
| IT-1976-0025           | 1976-09-11 16:35:01 | FRIULI                        | 46.256   | 13.233    | 4.3        | 5.8 | 5.6  | 277    | 30  | 90   |
| IT-1976-0027           | 1976-09-15 03:15:18 | FRIULI_2ND_SHOCK              | 46.285   | 13.203    | 6.8        | 6.1 | 5.9  | 274    | 35  | 90   |
| IT-1976-0030           | 1976-09-15 09:21:18 | FRIULI_3RD_SHOCK              | 46.3     | 13.174    | 11.3       | 6   | 6    | 276    | 35  | 110  |
| IT-1977-0008           | 1977-09-16 23:48:07 | NORTHERN_ITALY                | 46.283   | 13.019    | 10.8       | 5.3 | 5.3  | 291    | 35  | 119  |
| IT-1978-0002           | 1978-03-11 19:20:43 | SOUTHERN_ITALY                | 37.979   | 16.184    | 5          | 5.3 | 5.2  |        |     |      |
| IT-1978-0004           | 1978-04-15 23:33:47 | PATTL_GULF                    | 38.27    | 15.11     | 22         | 5.5 | 6    | 147    | 83  | 180  |
| IT-1979-0009           | 1979-09-19 21:35:37 | NORCIA                        | 42.8     | 13.04     | 6          | 5.5 | 5.8  | 183    | 28  | -7   |
| IT-1980-0003           | 1980-02-28 21:04:40 | CENTRAL_ITALY                 | 42.8     | 12.967    | 12         | 4.8 | 5    |        |     |      |
| IT-1980-0012           | 1980-11-23 18:34:53 | IRPINIA                       | 40.76    | 15.31     | 15         | 6.5 | 6.9  | 315    | 60  | -90  |
| IT-1980-0019           | 1980-11-24 00:24:00 | SOUTHERN_ITALY                | 40.811   | 15.268    | 13         | 5   |      |        |     |      |
| IT-1980-0020           | 1980-11-24 03:03:54 | SOUTHERN_ITALY                | 40.861   | 15.374    | 9          | 4.5 | 5    |        |     |      |
| IT-1980-0022           | 1980-11-25 17:06:44 | SOUTHERN_ITALY                | 40.609   | 15.462    | 18         | 5   |      |        |     |      |
| IT-1981-0001           | 1981-01-16 00:37:45 | SOUTHERN_ITALY                | 40.8378  | 15.4407   | 10.47      | 4.6 | 5.2  |        |     |      |
| IT-1982-0002           | 1982-03-21 09:44:00 | SOUTHERN_ITALY                | 39.7043  | 15.6385   | 18.9       | 5   |      |        |     |      |
| IT-1983-0005           | 1983-11-09 16:29:52 | NORTHERN_ITALY                | 44.6487  | 10.3665   | 28.1       | 5   | 5    |        |     |      |
| IT-1984-0002           | 1984-04-29 05:03:00 | GUBBIO                        | 43.21    | 12.57     | 5.97       | 5.2 | 5.6  | 130    | 20  | -90  |
| IT-1984-0004           | 1984-05-07 17:49:43 | LAZIO_ABRUZZO                 | 41.7     | 13.86     | 20.5       | 5.9 | 5.9  | 152    | 50  | -96  |
| IT-1984-0005           | 1984-05-11 10:41:48 | LAZIO_ABRUZZO                 | 41.78    | 13.89     | 12.1       | 5.7 | 5.5  | 317    | 49  | -103 |
| IT-1990-0001           | 1990-05-05 07:21:19 | POTENZA                       | 40.682   | 15.848    | 10         | 5.2 | 5.8  |        |     |      |
| IT-1990-0003           | 1990-12-13 00:24:26 | SICILY                        | 37.195   | 15.468    | 5          | 5.6 | 5.6  |        |     |      |
| IT-1991-0003           | 1991-05-26 12:26:01 | SOUTHERN_ITALY                | 40.675   | 15.805    | 5          | 4.3 | 5.1  |        |     |      |
| IT-1995-0003           | 1995-09-30 10:14:34 | SOUTHERN_ITALY                | 41.803   | 15.903    | 22.111     | 4.6 | 5.2  |        |     |      |
| FR-1996-0020           | 1996-07-15 00:13:28 | SWITZERLAND                   | 46.0236  | 6.0129    | 3.8        | 4.5 | 5.3  |        |     |      |
| IT-1996-0003           | 1996-10-15 09:56:00 | NORTHERN_ITALY                | 44.797   | 10.662    | 5          | 4.9 | 5.4  |        |     |      |
| IT-1997-0004           | 1997-09-26 00:33:11 | UMBRIA_MARCHE_1ST_SHOCK       | 43.023   | 12.892    | 5.7        | 5.6 | 5.7  | 148    | 40  | -83  |
| IT-1997-0006           | 1997-09-26 09:40:24 | UMBRIA_MARCHE_2ND_SHOCK       | 43.031   | 12.862    | 5.7        | 5.8 | 6    | 152    | 40  | -90  |
| IT-1997-0062           | 1997-10-03 08:55:20 | CENTRAL_ITALY                 | 43.038   | 12.848    | 4.8        | 5   | 5.2  | 141    | 43  | -74  |
| IT-1997-0091           | 1997-10-06 23:24:51 | CENTRAL_ITALY                 | 43.023   | 12.849    | 5.5        | 5.4 | 5.4  | 170    | 40  | -80  |
| IT-1997-0128           | 1997-10-12 11:08:35 | CENTRAL_ITALY                 | 42.924   | 12.952    | 4.8        | 5.1 | 5.2  | 154    | 51  | -82  |
| IT-1997-0137           | 1997-10-14 15:23:09 | UMBRIA_MARCHE_3RD_SHOCK       | 42.929   | 12.93     | 6          | 5.5 | 5.6  | 144    | 40  | -100 |
| IT-1998-0028           | 1998-03-21 16:45:09 | CENTRAL_ITALY                 | 42.978   | 12.906    | 5          | 4.6 | 5    |        |     |      |
| IT-1998-0050           | 1998-03-26 16:26:17 | CENTRAL_ITALY                 | 43.175   | 12.86     | 47.818     | 5.3 |      |        |     |      |
| IT-1998-0054           | 1998-04-03 07:26:36 | CENTRAL_ITALY                 | 43.177   | 12.786    | 9.649      | 4.9 | 5.1  |        |     |      |
| SI-1998-0010           | 1998-04-12 10:55:31 | BOVEC                         | 46.2506  | 13.6661   | 5.1        | 5.7 | 5.7  |        |     |      |
| IT-1998-0103           | 1998-09-09 11:28:00 | SOUTHERN_ITALY                | 39.979   | 16.026    | 7.434      | 5.5 | 5.6  |        |     |      |
| IT-2001-0032           | 2001-07-17 15:06:14 | NORTHERN_ITALY                | 46.626   | 11.049    | 3.487      | 5.3 | 4.8  |        |     |      |
| IT-2002-0024           | 2002-09-06 01:21:28 | SICILY                        | 38.381   | 13.701    | 5          | 5.6 | 5.8  | 251    | 53  | 112  |
| IT-2002-0045           | 2002-10-31 10:33:00 | MOLISE_1ST_SHOCK              | 41.696   | 14.928    | 10         | 5.4 | 5.7  | 267    | 82  | -157 |
| IT-2002-0047           | 2002-11-01 15:09:02 | MOLISE_2ND_SHOCK              | 41.719   | 14.841    | 10         | 5.3 | 5.7  | 261    | 86  | -165 |
| IT-2003-0019           | 2003-03-29 17:42:13 | ADRIATIC_SEA                  | 43.1345  | 15.393    | 7.8878     | 5.3 | 5.5  |        |     |      |
| IT-2003-0048           | 2003-09-14 21:42:53 | NORTHERN_ITALY                | 44.255   | 11.38     | 8.33       | 5.3 | 5.3  | 94     | 53  | 107  |
| IT-2004-0084           | 2004-05-05 13:39:41 | SICILY                        | 38.52    | 14.901    | 255.291    | 5.3 | 5.4  |        |     |      |
| IT-2004-0109           | 2004-07-12 13:04:04 | AUSTRIA                       | 46.3222  | 13.6571   | 4.101      | 4.9 | 5.16 |        |     |      |
| IT-2004-0181           | 2004-11-24 22:59:38 | GARDA LAKE                    | 45.685   | 10.521    | 5.444      | 5.2 | 5    |        |     |      |
| IT-2004-0182           | 2004-11-25 06:21:15 | ADRIATIC_SEA                  | 43.1894  | 15.3994   | 0.218      | 4.9 | 5.3  |        |     |      |
| IT-2006-0272           | 2006-10-26 14:28:36 | SICILY                        | 38.658   | 15.495    | 220.7      | 5.7 | 5.8  |        |     |      |
| IT-2007-0115           | 2007-07-04 23:55:32 | SICILY                        | 38.831   | 15.265    | 279.3      | 4.9 | 5.2  |        |     |      |
| IT-2008-0003           | 2008-12-17 21:57:42 | SOUTHERN_ITALY                | 39.168   | 15.586    | 269.4      | 5.1 | 5.2  |        |     |      |
| IT-2008-0004           | 2008-12-23 15:24:21 | NORTHERN_ITALY                | 44.544   | 10.345    | 22.9       | 5.2 | 5.5  |        |     |      |
| IT-2009-0009           | 2009-04-06 01:32:40 | L_AQUILA                      | 42.342   | 13.38     | 8.3        | 5.9 | 6.1  | 140    | 50  | -90  |
| IT-2009-0032           | 2009-04-06 02:37:04 | CENTRAL_ITALY                 | 42.36    | 13.328    | 8.7        | 4.6 | 5.1  | 128    | 55  | -122 |
| IT-2009-0084           | 2009-04-06 23:15:36 | CENTRAL_ITALY                 | 42.463   | 13.385    | 9.7        | 5   | 5.1  | 132    | 50  | -109 |
| IT-2009-0095           | 2009-04-07 09:26:28 | CENTRAL_ITALY                 | 42.336   | 13.387    | 9.6        | 4.8 | 5.1  | 128    | 54  | -111 |
| IT-2009-0102           | 2009-04-07 17:47:37 | CENTRAL_ITALY                 | 42.303   | 13.486    | 17.1       | 5.4 | 5.5  | 105    | 53  | -134 |
| IT-2009-0121           | 2009-04-09 00:52:59 | CENTRAL_ITALY                 | 42.489   | 13.351    | 11         | 5.1 | 5.4  | 136    | 46  | -99  |
| IT-2009-0140           | 2009-04-09 19:38:16 | CENTRAL_ITALY                 | 42.504   | 13.35     | 9.3        | 5   | 5.2  | 132    | 46  | -97  |
| IT-2009-0174           | 2009-04-13 21:14:24 | CENTRAL_ITALY                 | 42.498   | 13.377    | 9          | 5   | 5    | 133    | 54  | -104 |
| EMSC-20101103.00000077 | 2010-11-03 18:13:10 | TYRRHENIAN_SEA                | 40.0305  | 13.2575   | 469.1419   | 5.1 | 5.21 |        |     |      |
| EMSC-20110707.00000048 | 2011-07-07 19:21:47 | WESTERN_MEDITERRANEAN_SEA     | 42.0875  | 7.593     | 8.9571     | 4.5 | 5.12 |        |     |      |
| IT-2012-0002           | 2012-01-25 08:06:37 | NORTHERN_ITALY                | 44.871   | 10.51     | 29         | 5   |      |        |     |      |
| IT-2012-0004           | 2012-01-27 14:53:12 | NORTHERN_ITALY                | 44.523   | 10.009    | 72.4       | 5.2 | 5    |        |     |      |
| IT-2012-0008           | 2012-05-20 02:03:50 | EMILIA_1ST_SHOCK              | 44.8955  | 11.2635   | 9.5        | 5.9 | 6.1  | 114    | 40  | 90   |
| IT-2012-0068           | 2012-05-20 02:07:28 | NORTHERN_ITALY                | 44.8737  | 11.2703   | 6.1        | 5   |      |        |     |      |
| IT-2012-0009           | 2012-05-20 03:02:47 | NORTHERN_ITALY                | 44.8597  | 11.152    | 9.1        | 5   | 5.1  | 103    | 27  | 89   |
| IT-2012-0006           | 2012-05-20 13:18:01 | NORTHERN_ITALY                | 44.8135  | 11.4407   | 3.35       | 5.1 | 5.2  | 100    | 37  | 64   |
| IT-2012-0011           | 2012-05-29 07:00:02 | EMILIA_2ND_SHOCK              | 44.8417  | 11.0657   | 8.07       | 5.8 | 6    | 95     | 60  | 90   |
| IT-2012-0066           | 2012-05-29 08:25:51 | NORTHERN_ITALY                | 44.8647  | 10.9475   | 7.87       | 5   | 4.7  | 105    | 21  | 94   |
| IT-2012-0010           | 2012-05-29 10:55:56 | NORTHERN_ITALY                | 44.8652  | 10.9795   | 4.35       | 5.3 | 5.5  | 112    | 32  | 101  |
| IT-2012-0076           | 2012-05-29 11:00:01 | MODENA                        | 44.8558  | 10.941    | 8.68       | 5   | 4.9  | 90     | 38  | 66   |
| IT-2012-0032           | 2012-05-29 11:00:22 | NORTHERN_ITALY                | 44.866   | 10.9763   | 7.2        | 5.1 | 5.5  | 111    | 51  | 97   |
| IT-2012-0012           | 2012-06-03 19:20:43 | NORTHERN_ITALY                | 44.886   | 10.9502   | 8.66       | 5.1 | 4.9  | 92     | 16  | 37   |
| IT-2012-0061           | 2012-10-25 23:05:24 | COSENZA                       | 39.8747  | 16.0158   | 9.7        | 5   |      |        |     |      |
| IT-2013-0005           | 2013-06-21 10:33:56 | NORTHERN_ITALY                | 44.1308  | 10.1357   | 7          | 5.2 | 5.1  |        |     |      |
| EMSC-20131118.00000035 | 2013-11-18 07:58:41 | NORTHWESTERN_BALKAN_PENINSULA | 43.6766  | 16.8623   | 9.704      | 4.8 | 4.39 |        |     |      |
| EMSC-20131229.00000030 | 2013-12-29 06:54:57 | NORTHWESTERN_BALKAN_PENINSULA | 43.0937  | 17.2425   | 10         | 4.4 | 4.2  |        |     |      |
| IT-2013-0019           | 2013-12-29 17:08:43 | CASERTA                       | 41.3952  | 14.4342   | 20.4       | 5   | 5    |        |     |      |
| EMSC-20140405.00000052 | 2014-04-05 10:24:44 | SOUTHERN_ITALY                | 38.766   | 17.2525   | 75.2       | 5   | 4.7  |        |     |      |
| EMSC-20160824.00000006 | 2016-08-24 01:36:32 | CENTRAL_ITALY                 | 42.6983  | 13.2335   | 8.1        | 6   | 6    | 156    | 50  | -85  |
| EMSC-20160824.00000013 | 2016-08-24 02:33:29 | CENTRAL_ITALY                 | 42.7922  | 13.1507   | 8          | 5.4 | 5.3  | 135    | 47  | -98  |
| EMSC-20161026.00000077 | 2016-10-26 17:10:36 | CENTRAL_ITALY                 | 42.8747  | 13.1243   | 8.1        | 5.4 | 5.4  | 161    | 38  | -90  |
| EMSC-20161026.00000095 | 2016-10-26 19:18:06 | CENTRAL_ITALY                 | 42.9087  | 13.1288   | 7.5        | 5.9 | 5.9  | 159    | 47  | -75  |
| EMSC-20161028.00001138 | 2016-10-28 20:02:49 | TYRRHENIAN_SEA                | 39.3381  | 13.5229   | 460.1445   | 5.8 | 5.79 |        |     |      |
| EMSC-20161030.00000029 | 2016-10-30 06:40:18 | CENTRAL_ITALY                 | 42.8322  | 13.1107   | 9.2        | 6.1 | 6.5  | 151    | 47  | -95  |
| EMSC-20170118.00000027 | 2017-01-18 09:25:42 | CENTRAL_ITALY                 | 42.545   | 13.2768   | 10         | 5.4 | 5.1  | 153    | 32  | -88  |
| EMSC-20170118.00000034 | 2017-01-18 10:14:12 | CENTRAL_ITALY                 | 42.531   | 13.2838   | 9.6        | 5.4 | 5.5  | 161    | 51  | -86  |
| EMSC-20170118.00000037 | 2017-01-18 10:25:26 | CENTRAL_ITALY                 | 42.5033  | 13.277    | 9.4        | 5.3 | 5.4  | 140    | 35  | -89  |
| EMSC-20170118.00000119 | 2017-01-18 13:33:37 | CENTRAL_ITALY                 | 42.4733  | 13.2747   | 9.5        | 5.1 | 5    | 188    | 30  | -39  |
| EMSC-20180816.00000090 | 2018-08-16 18:19:06 | SOUTHERN_ITALY                | 41.8742  | 14.8648   | 19.6       | 5.2 | 5.1  |        |     |      |

Table S1: Event List

## 2 Impulsive Earthquakes

### 2.1 IT-1976-0025

#### 2.1.1 Shahi and Baker (2014)

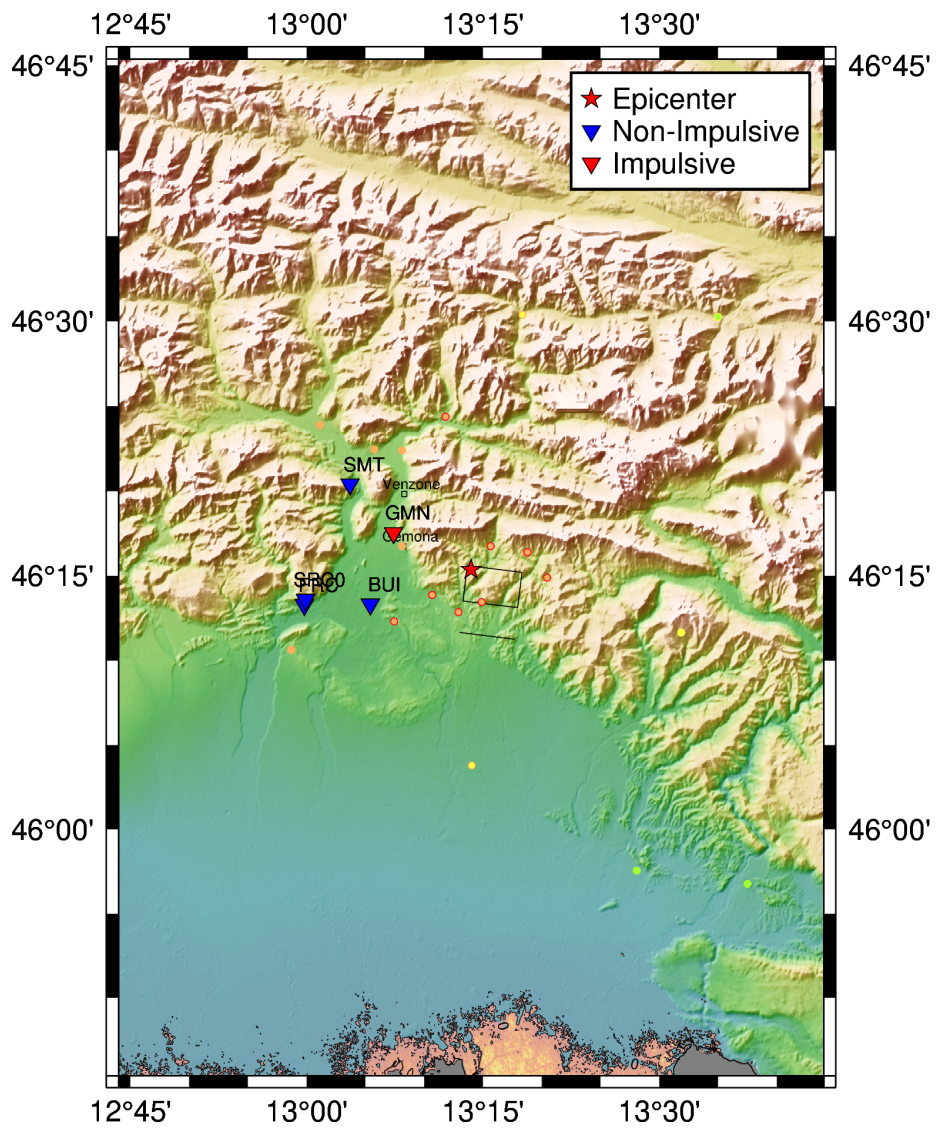

### 2.1.2 Chang et al. (2016)

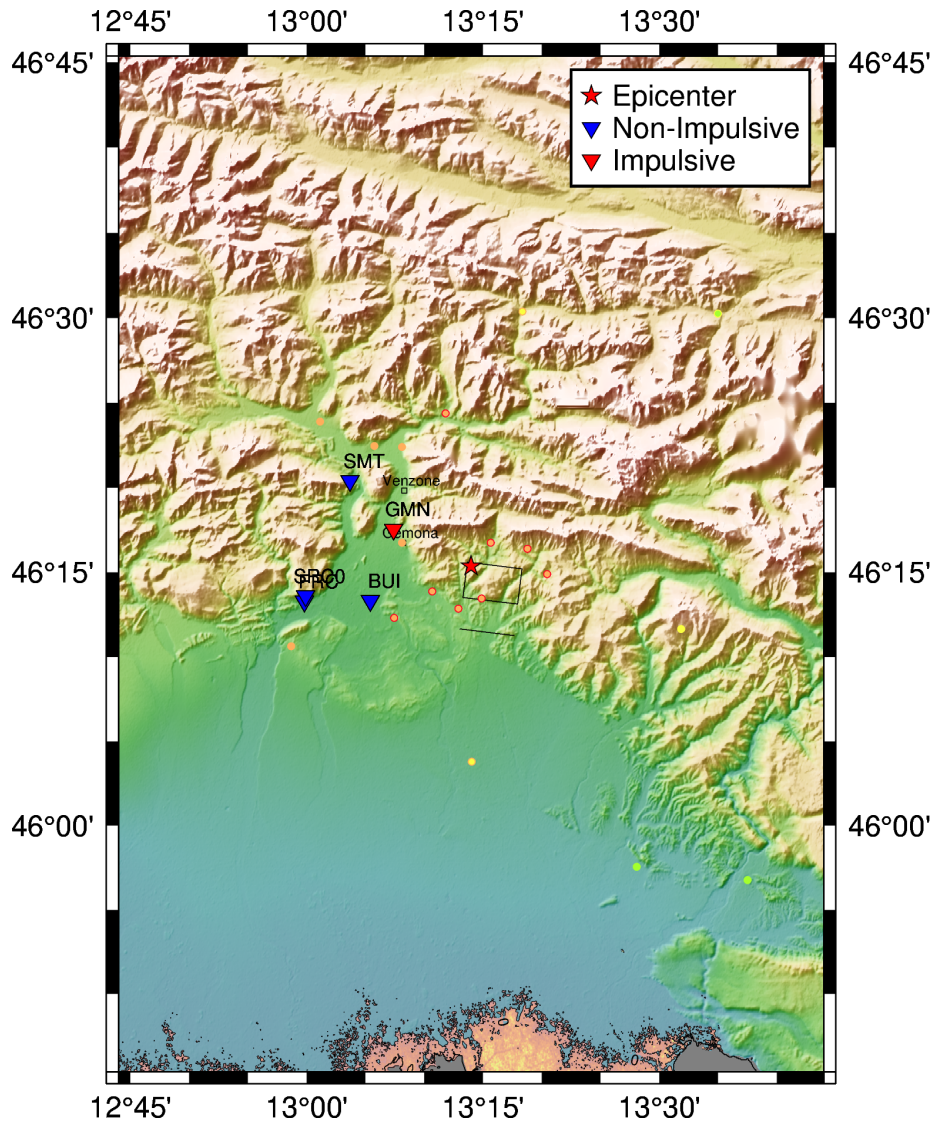

### 2.1.3 Ertuncay and Costa



## 2.2 IT-1976-0027

### 2.2.1 Shahi and Baker (2014)

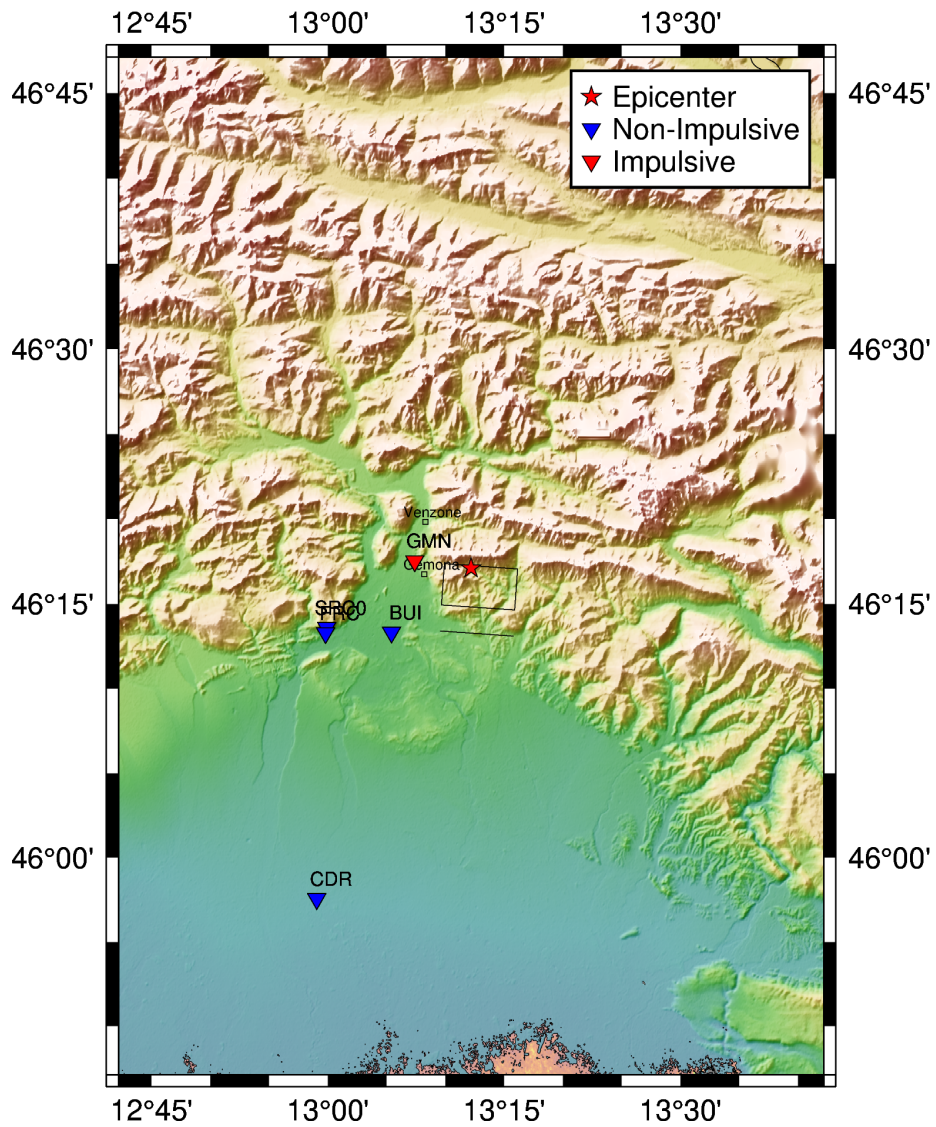

### 2.2.2 Chang et al. (2016)

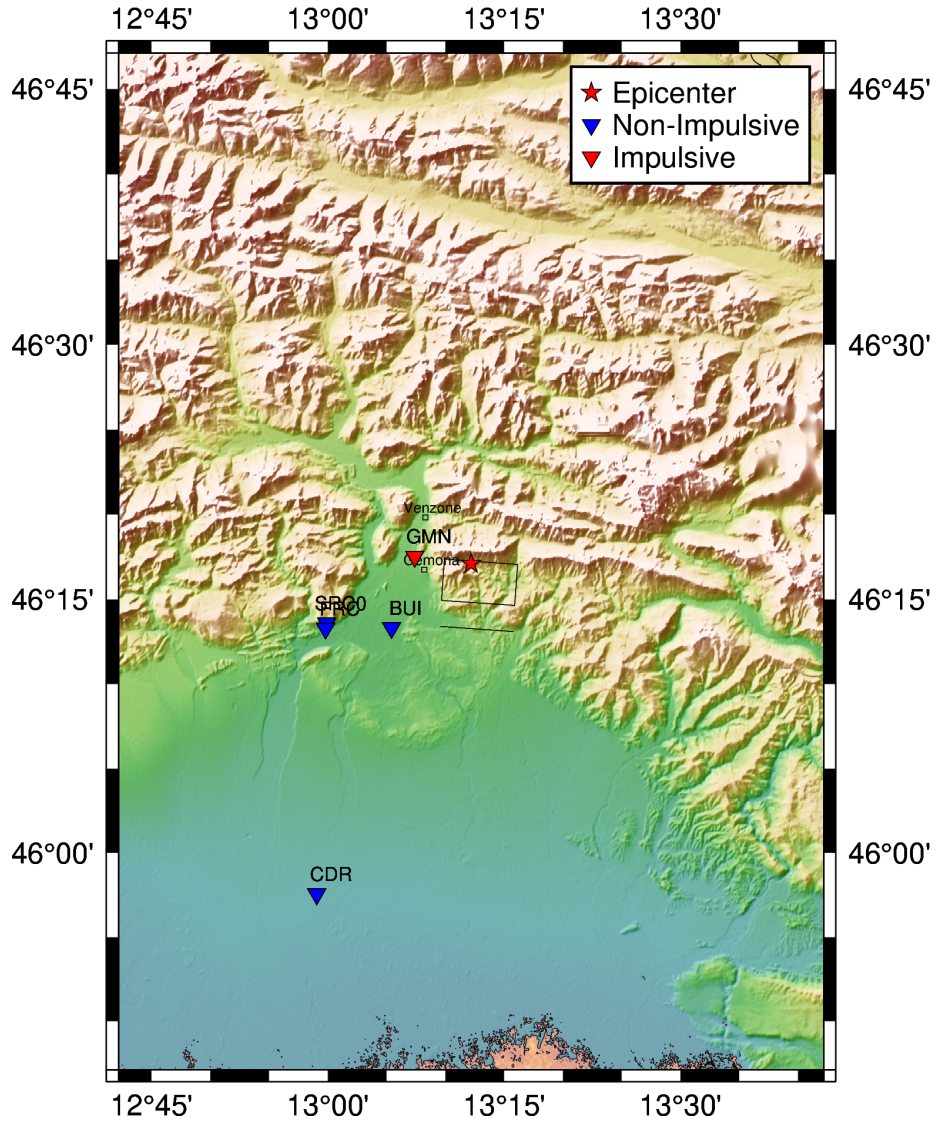

### 2.2.3 Ertuncay and Costa



## 2.3 IT-1976-0030

### 2.3.1 Shahi and Baker (2014)

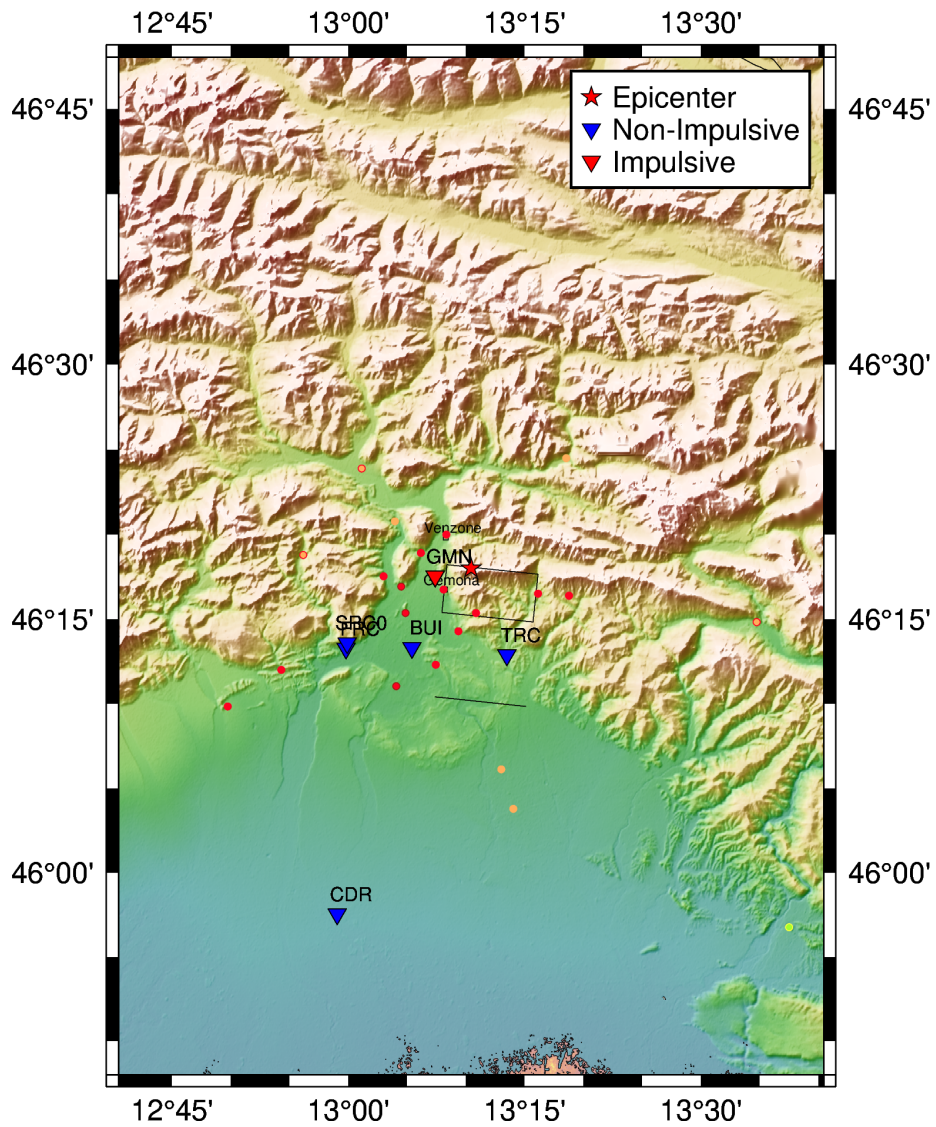

### 2.3.2 Chang et al. (2016)

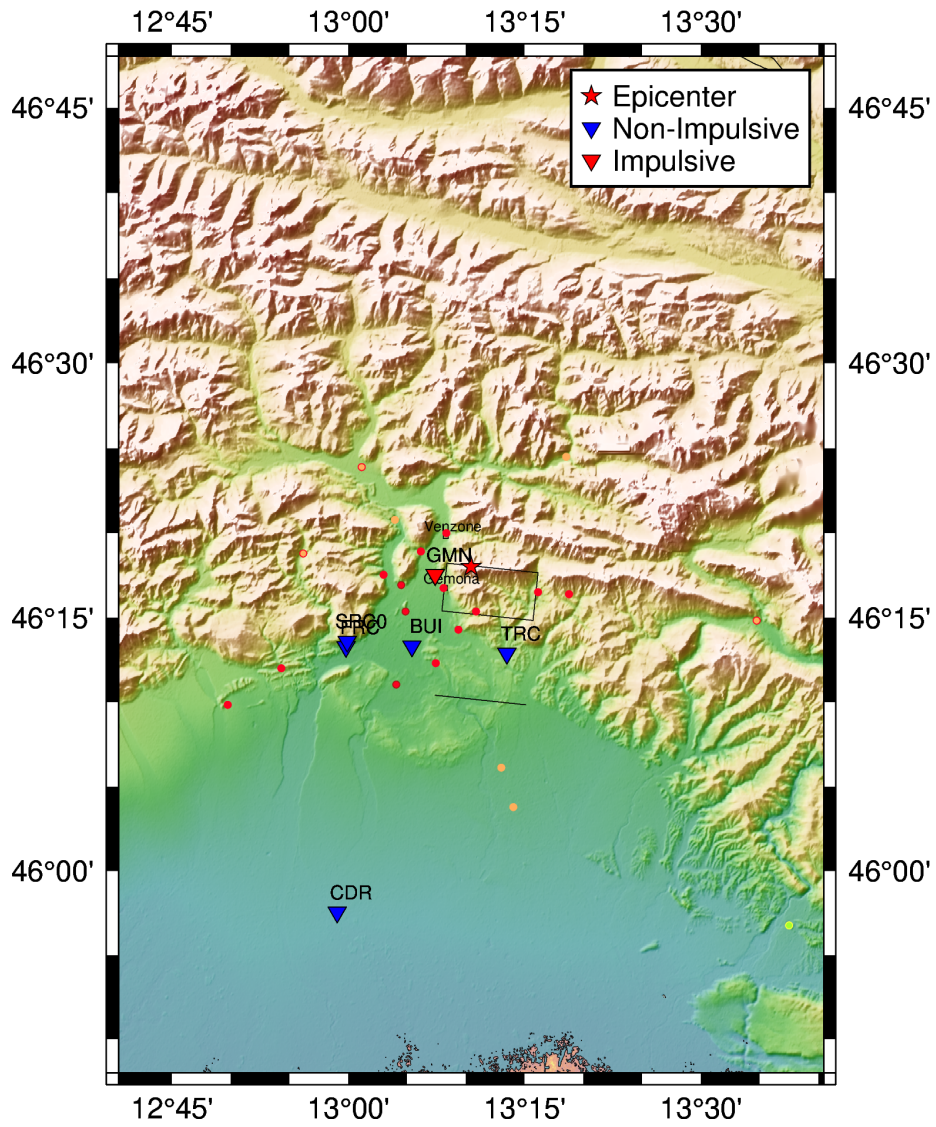

### 2.3.3 Ertuncay and Costa

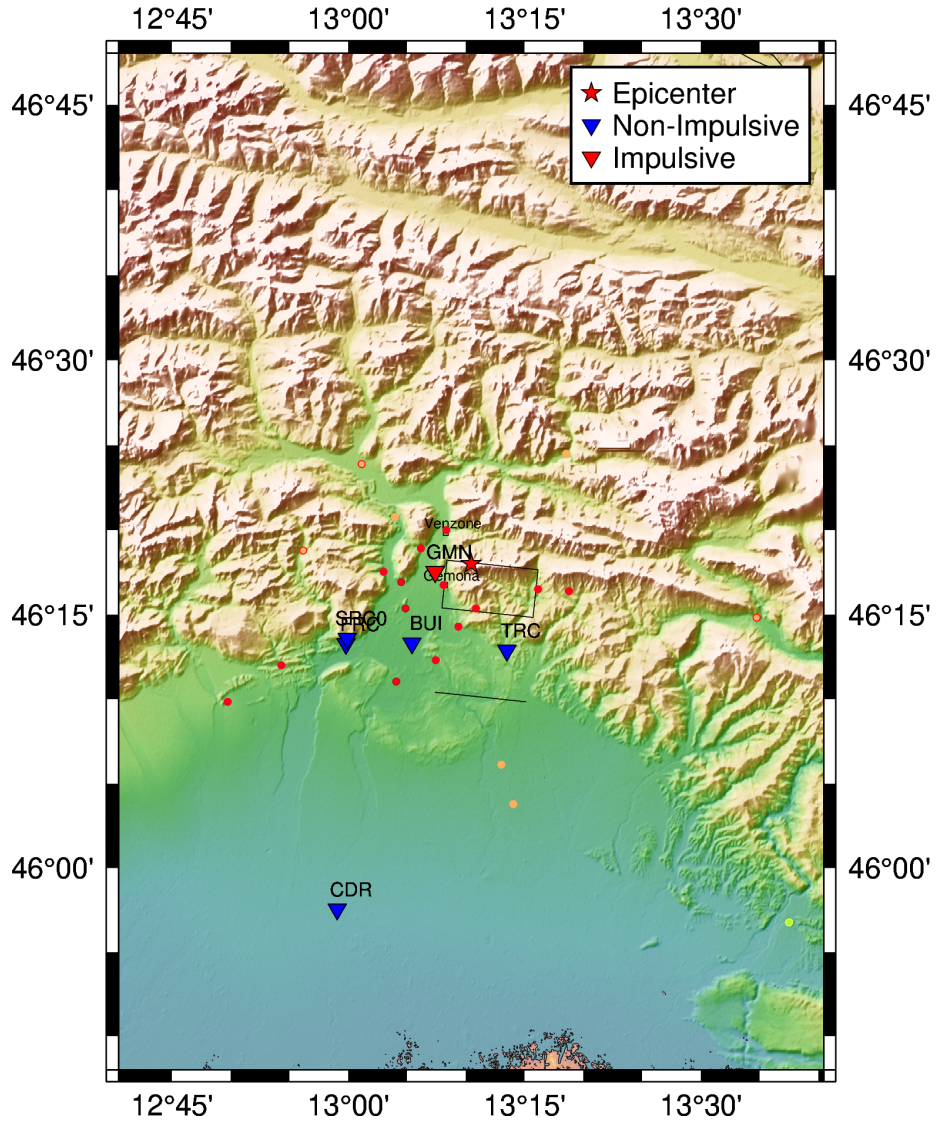

## 2.4 IT-1980-0012

### 2.4.1 Shahi and Baker (2014)

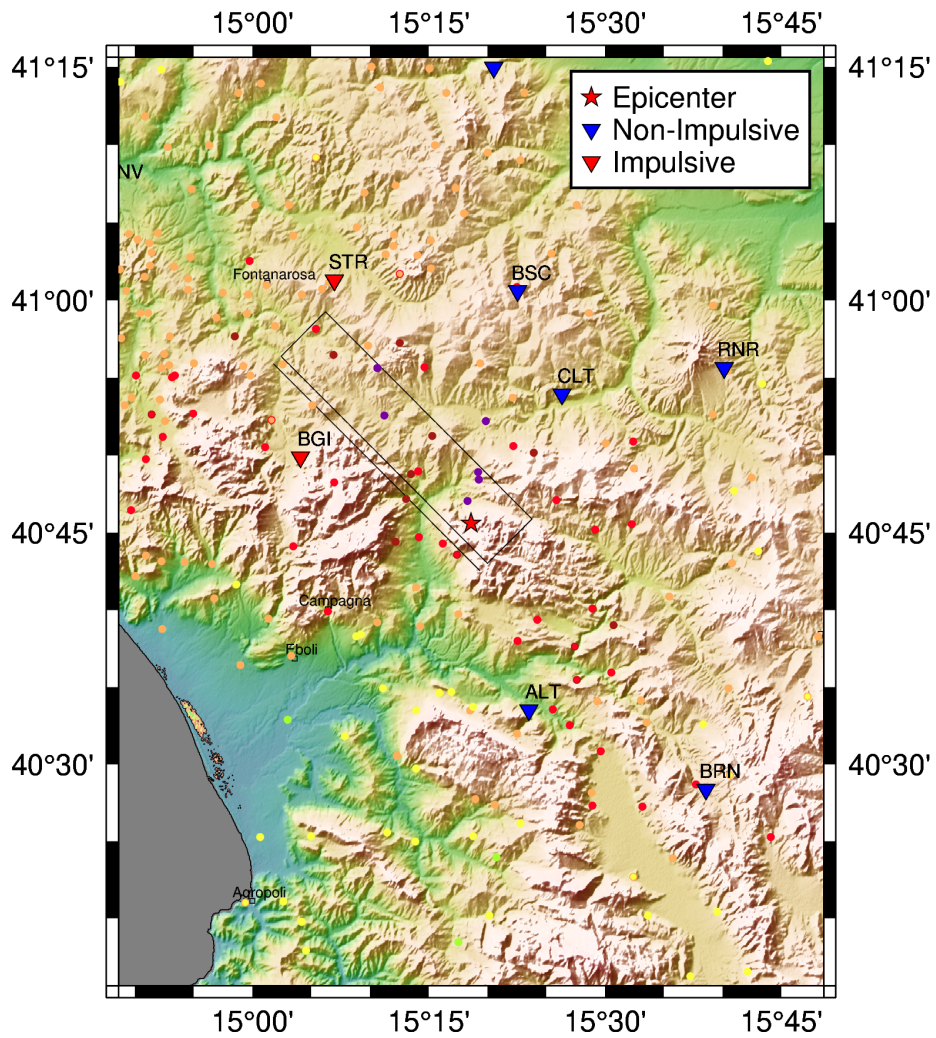

#### 2.4.2 Chang et al. (2016)

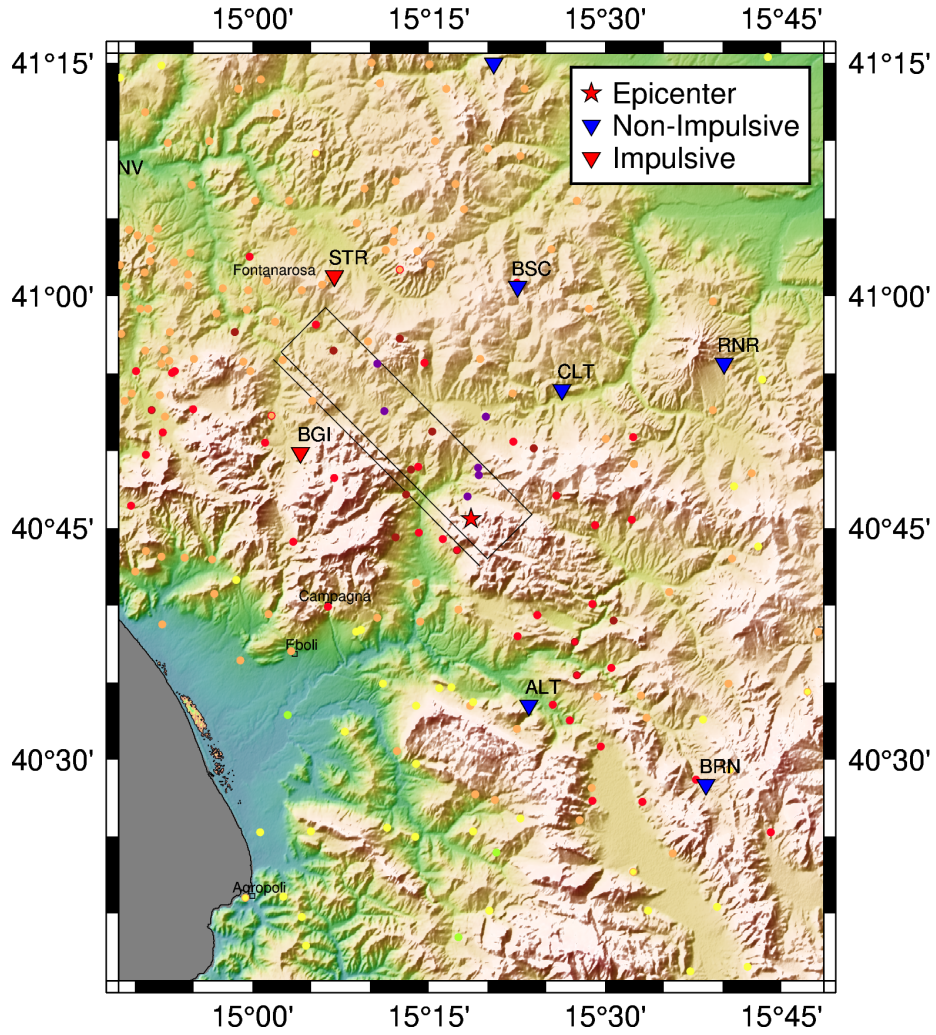

### 2.4.3 Ertuncay and Costa



## 2.5 IT-2009-0009

### 2.5.1 Shahi and Baker (2014)

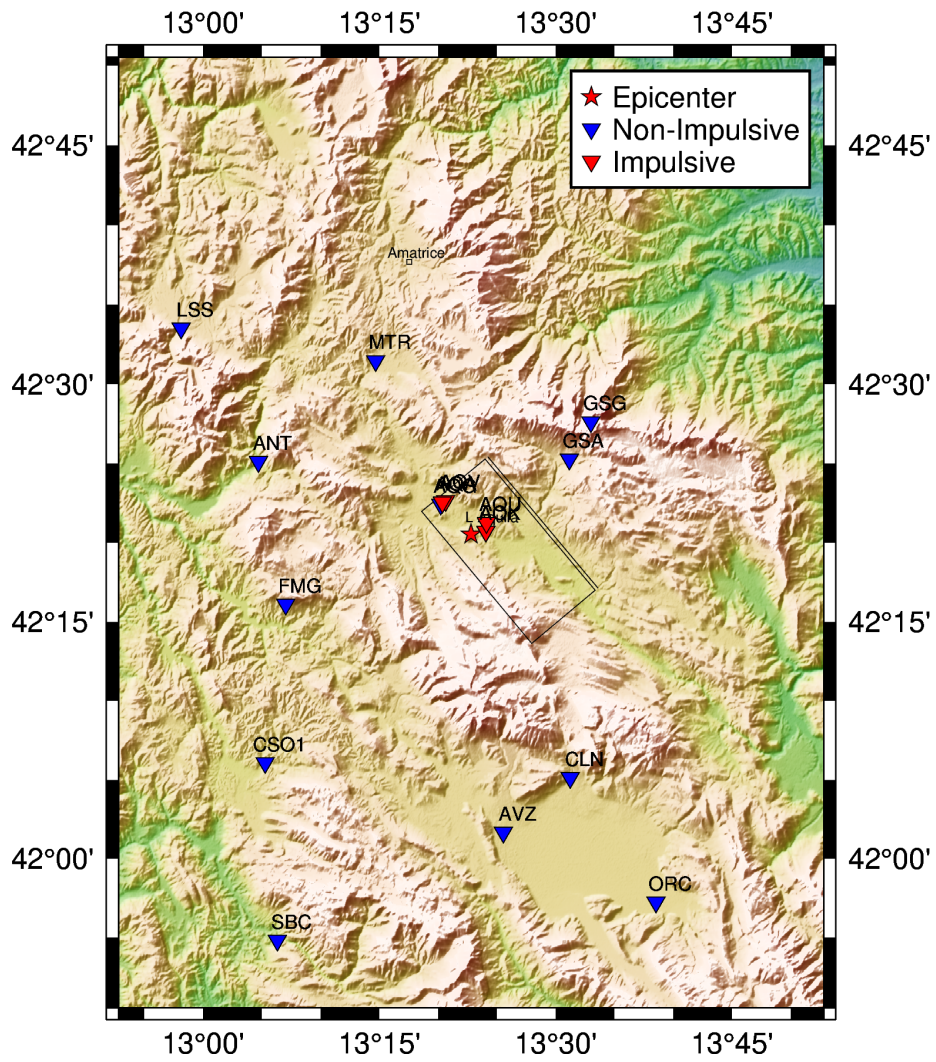

### 2.5.2 Chang et al. (2016)

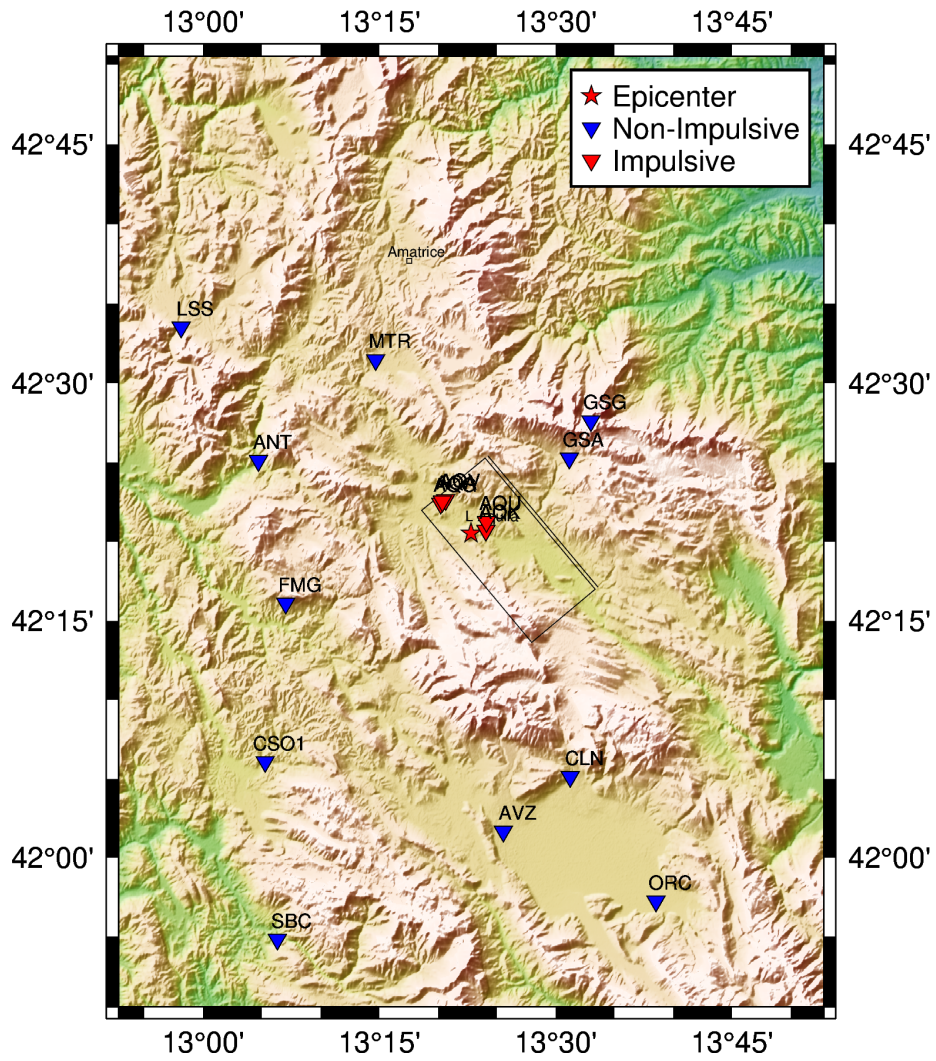

### 2.5.3 Ertuncay and Costa



## 2.6 IT-2012-0008

### 2.6.1 Shahi and Baker (2014)

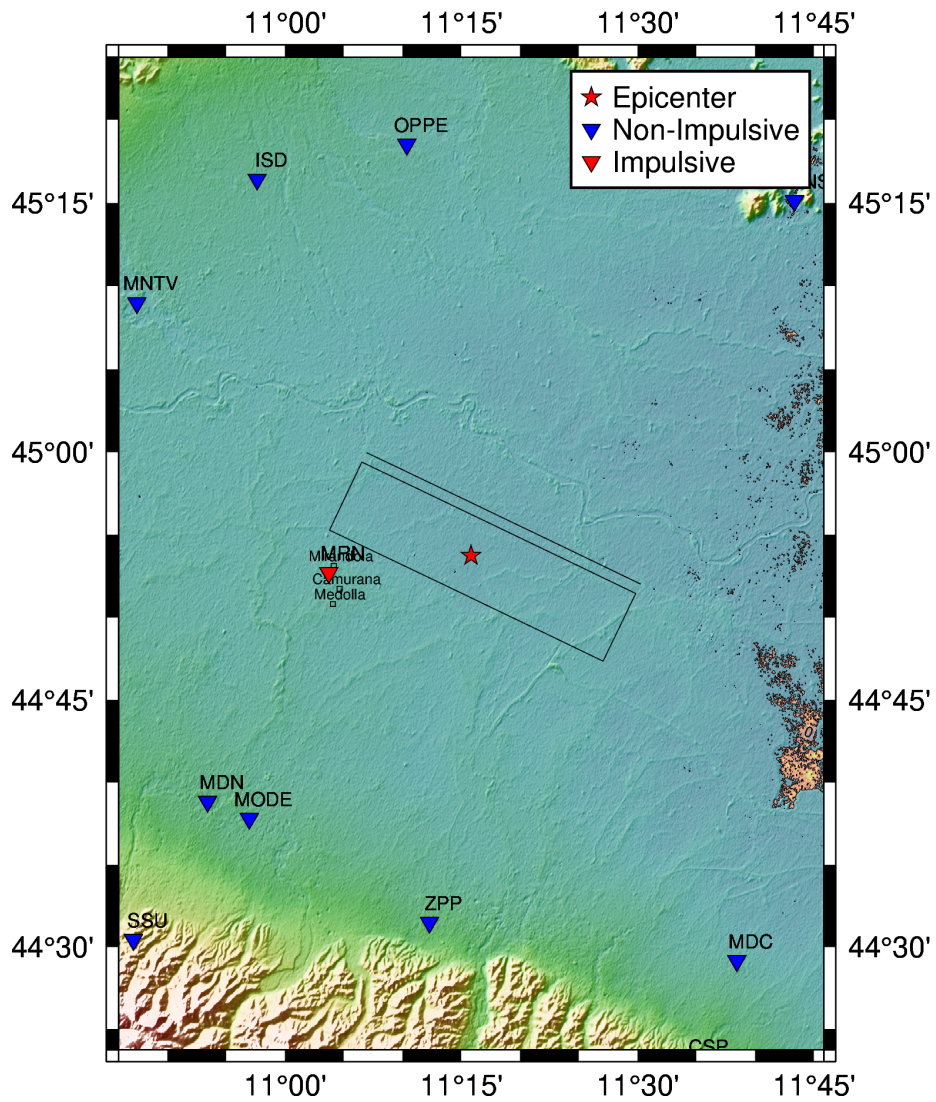

### 2.6.2 Chang et al. (2016)

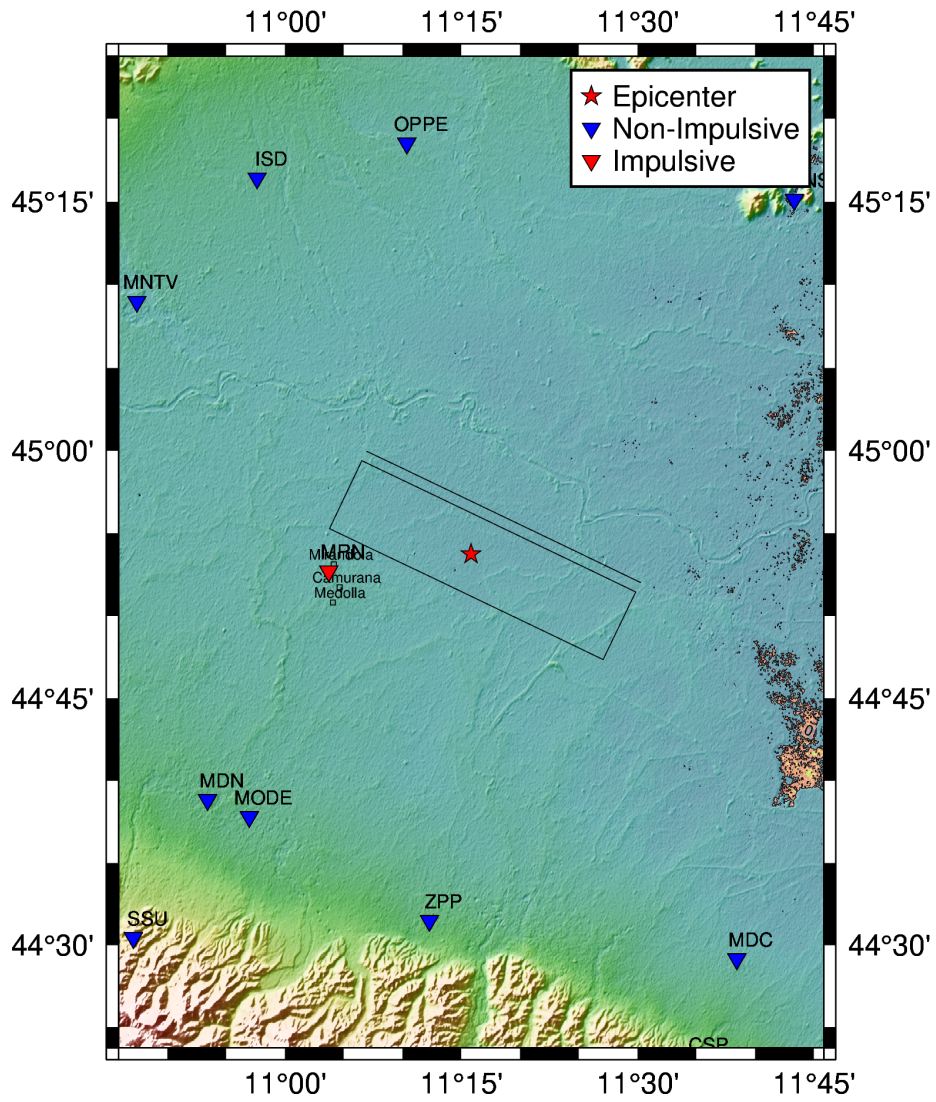

### 2.6.3 Ertuncay and Costa

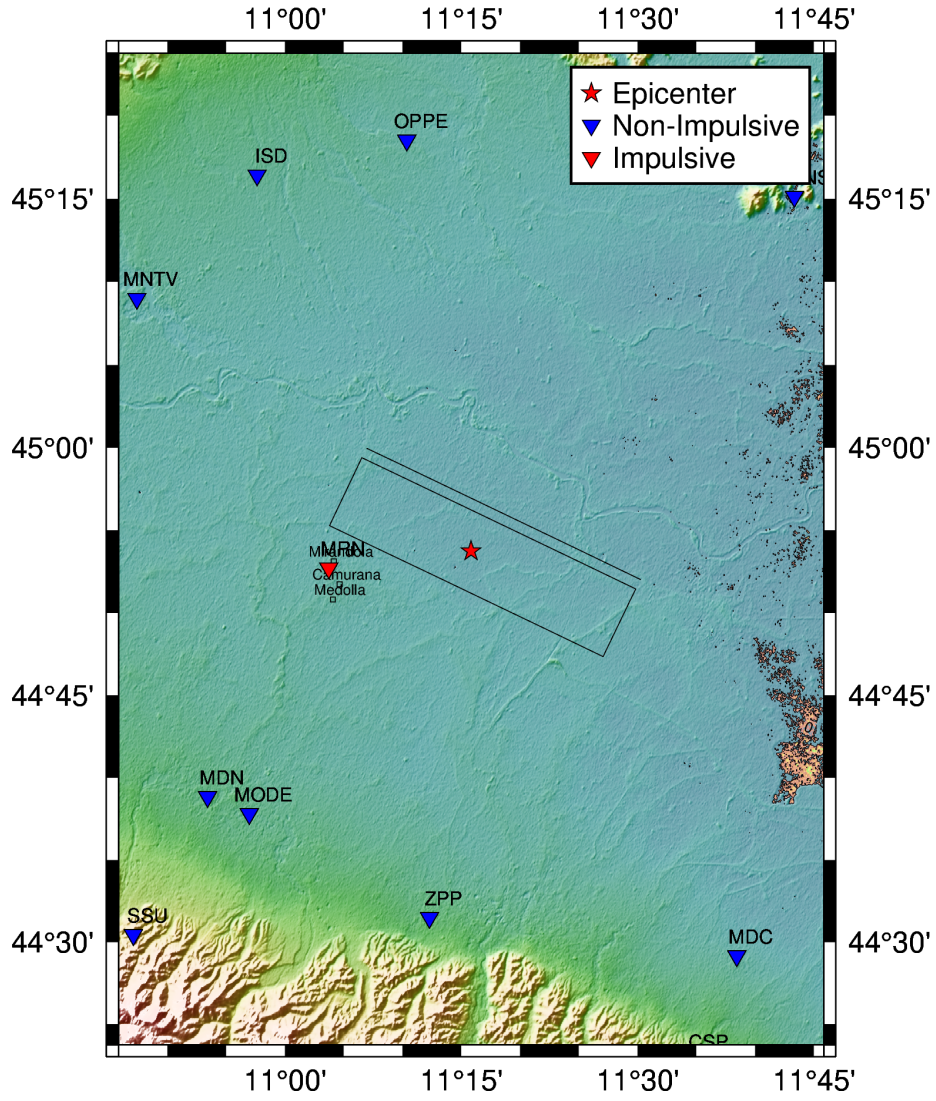



### 2.7.2 Chang et al. (2016)

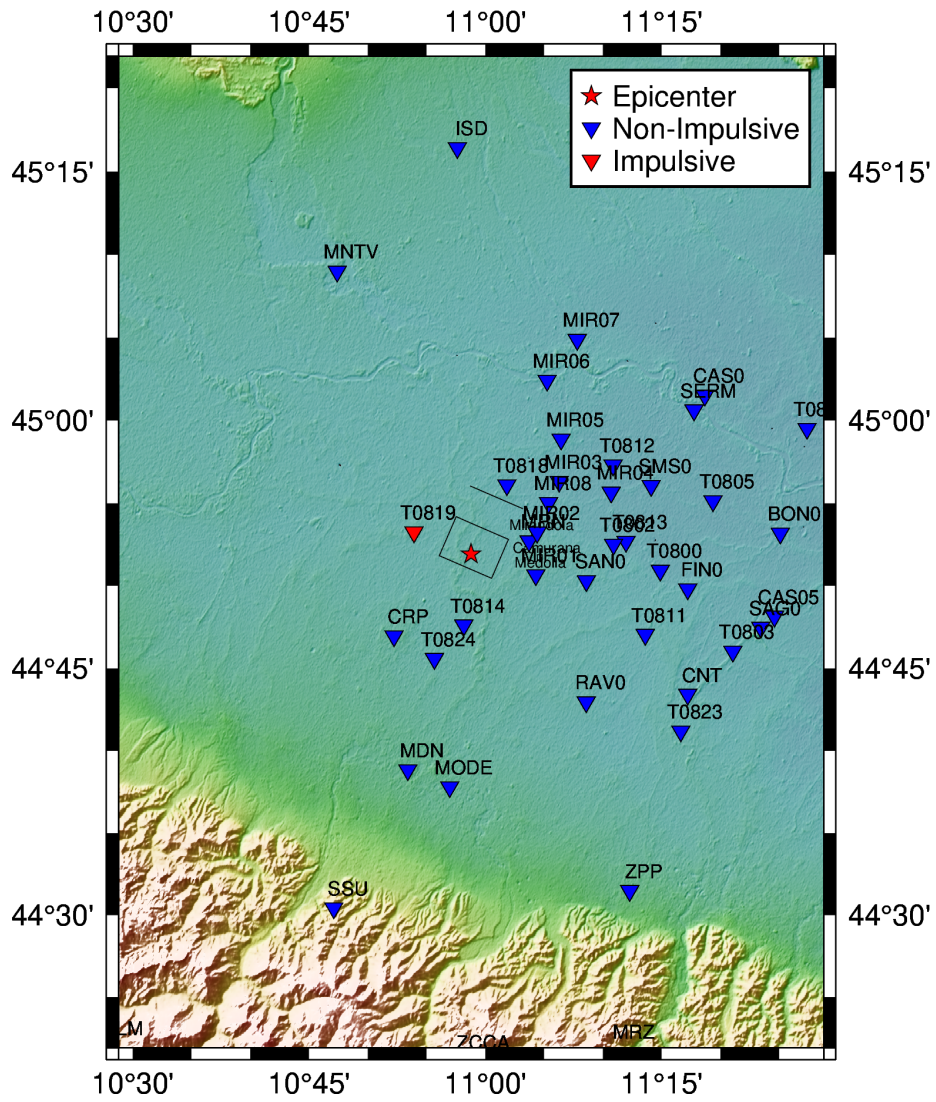

### 2.7.3 Ertuncay and Costa

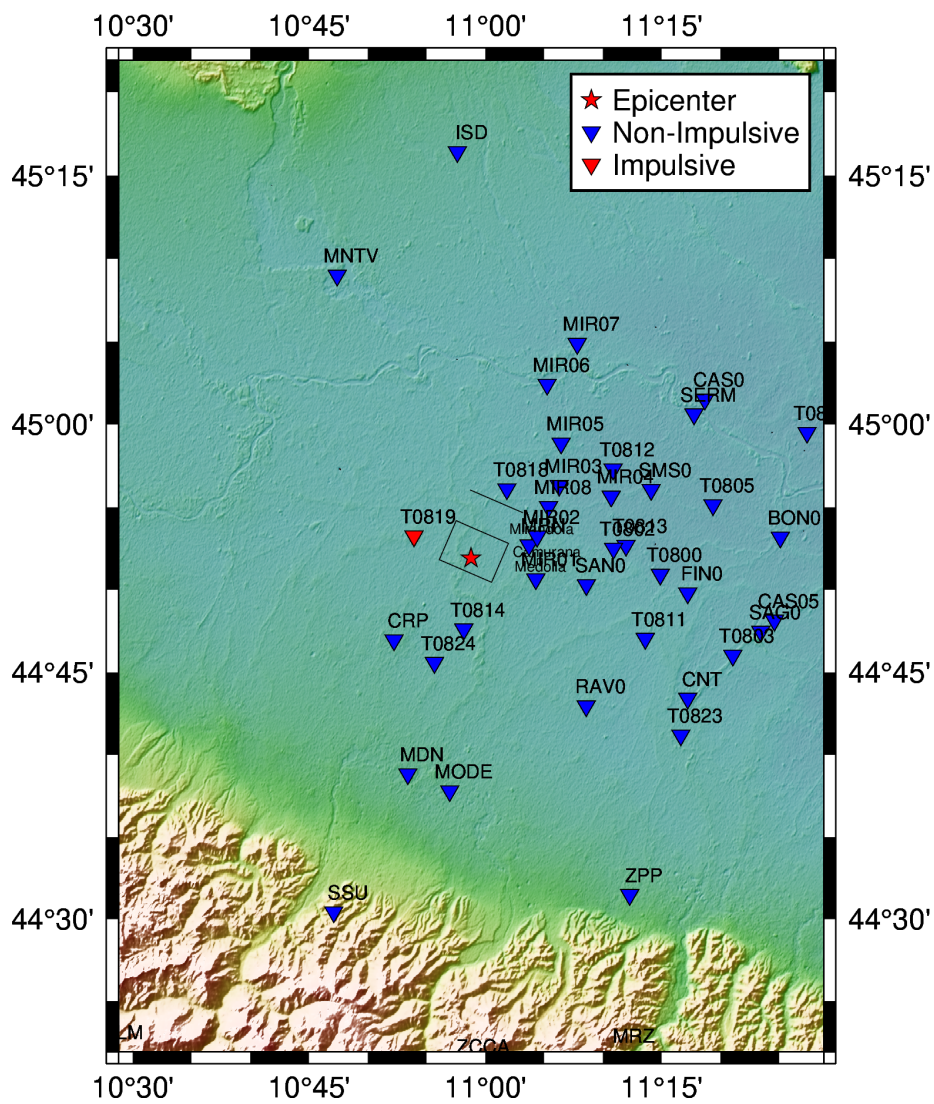



### 2.8.2 Chang et al. (2016)

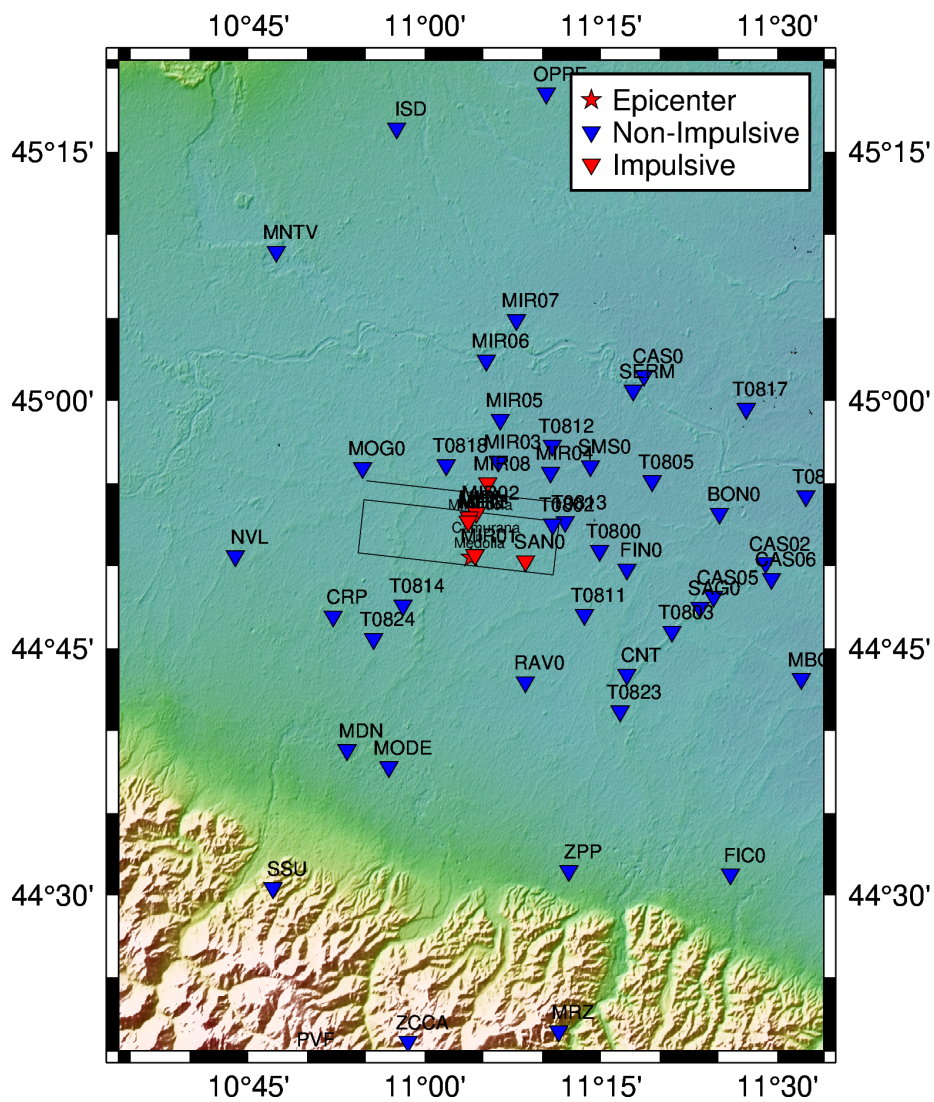

### 2.8.3 Ertuncay and Costa



## 2.9 IT-2012-0012

### 2.9.1 Shahi and Baker (2014)

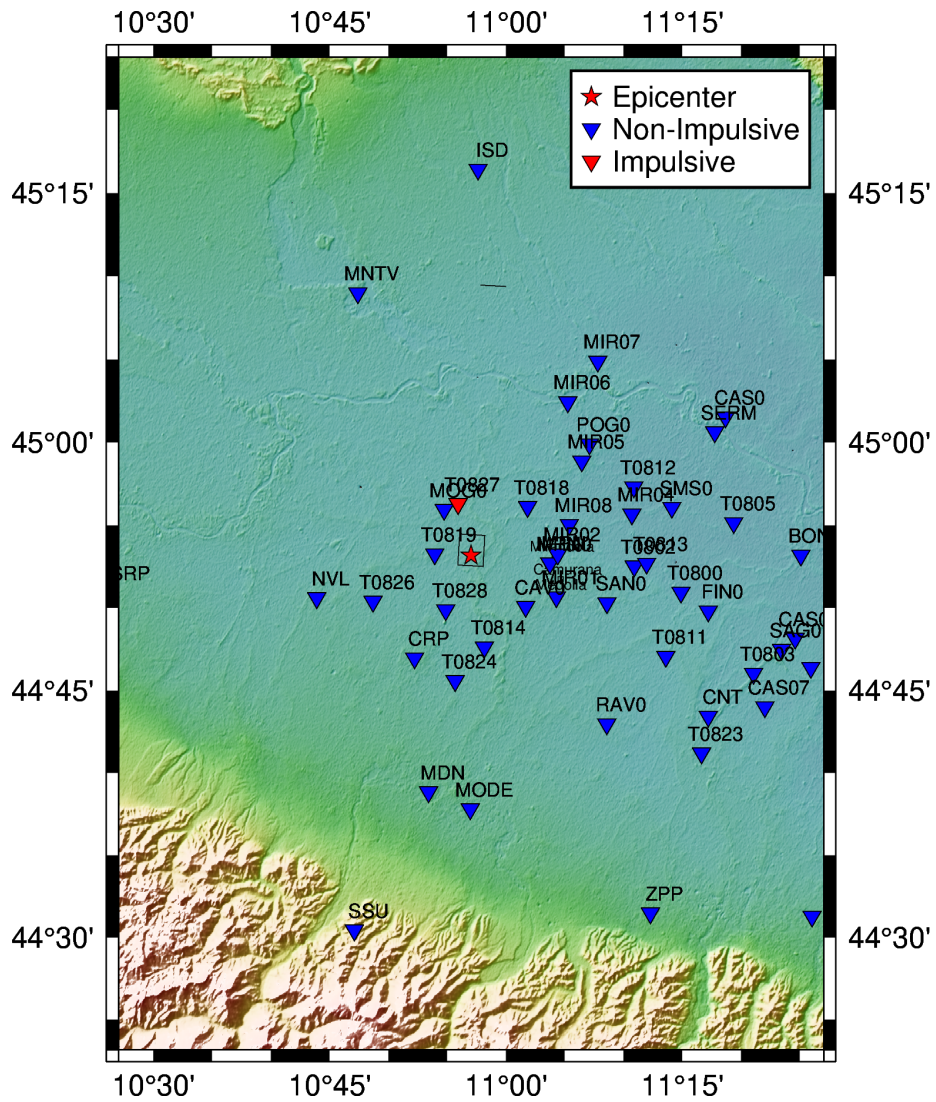

### 2.9.2 Chang et al. (2016)

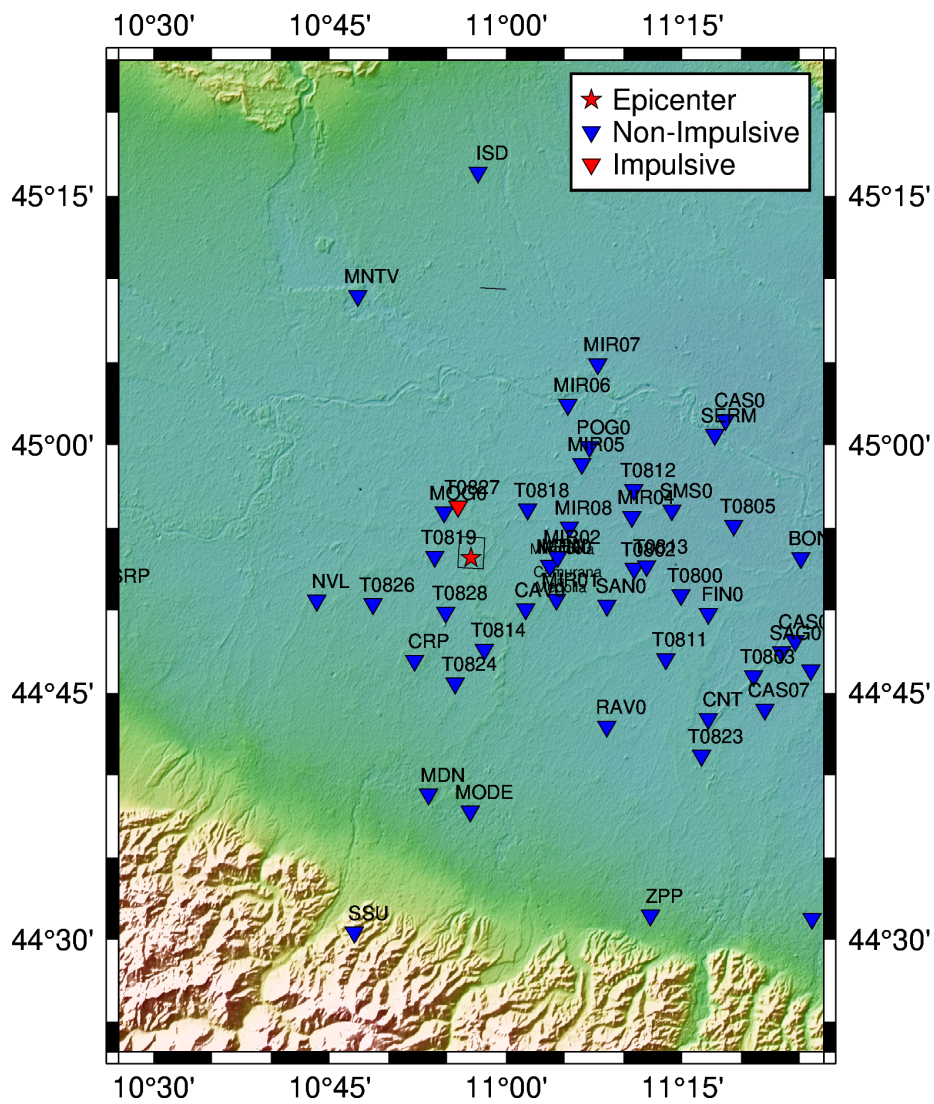

### 2.9.3 Ertuncay and Costa

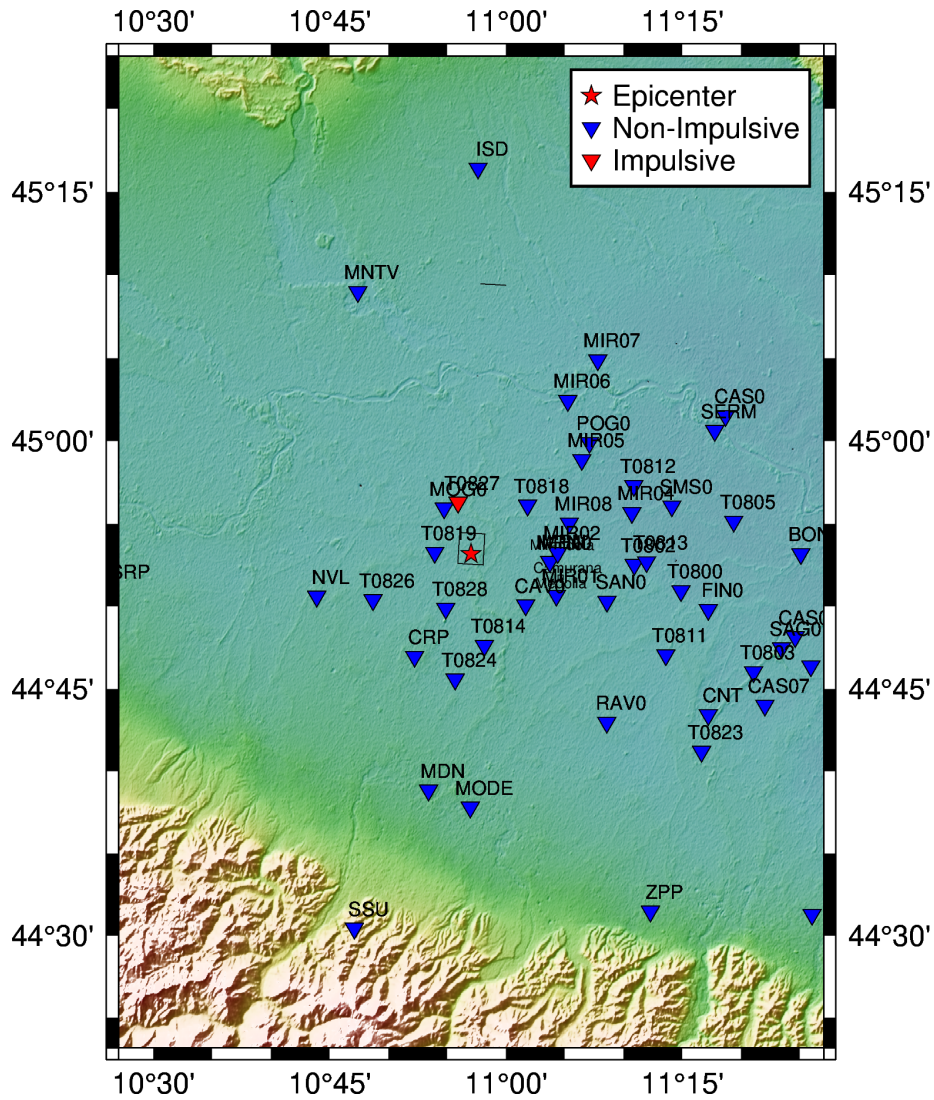

## 2.10 EMSC-20160824\_0000006

### 2.10.1 Shahi and Baker (2014)

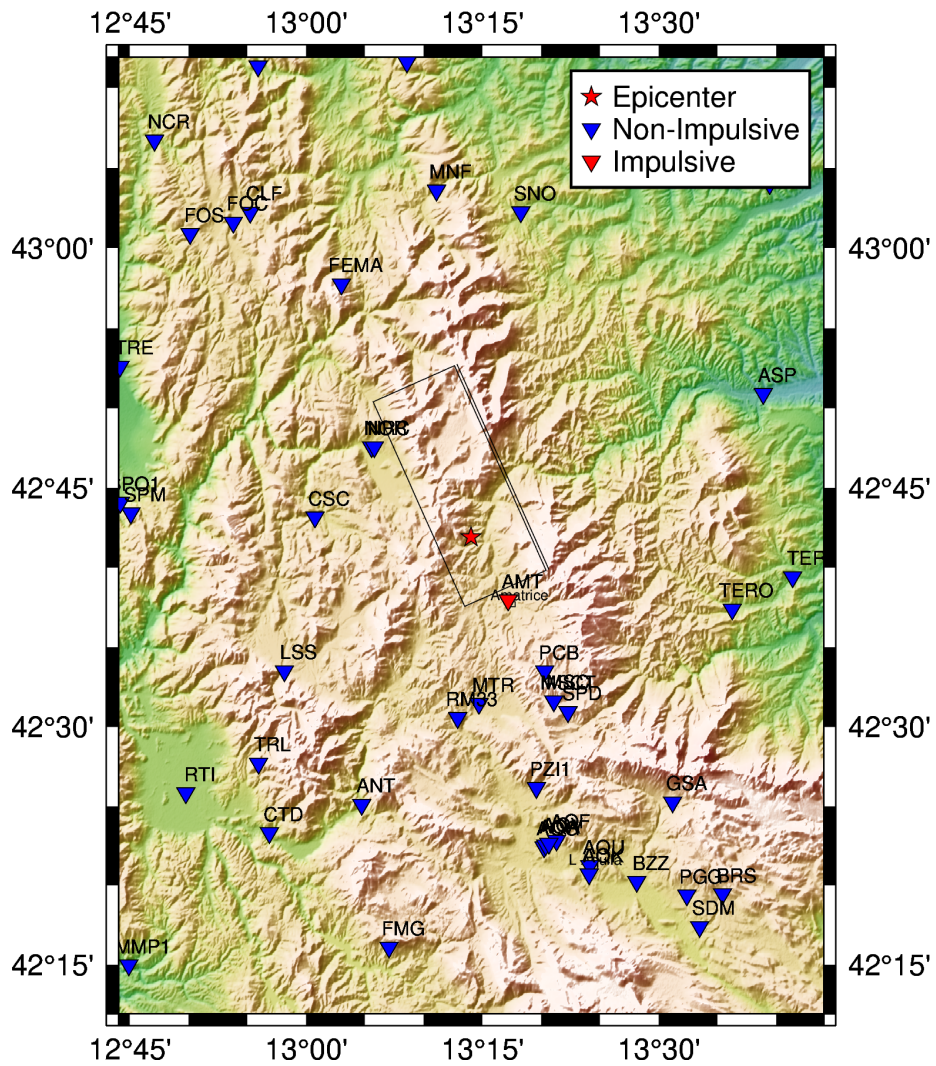

### 2.10.2 Chang et al. (2016)

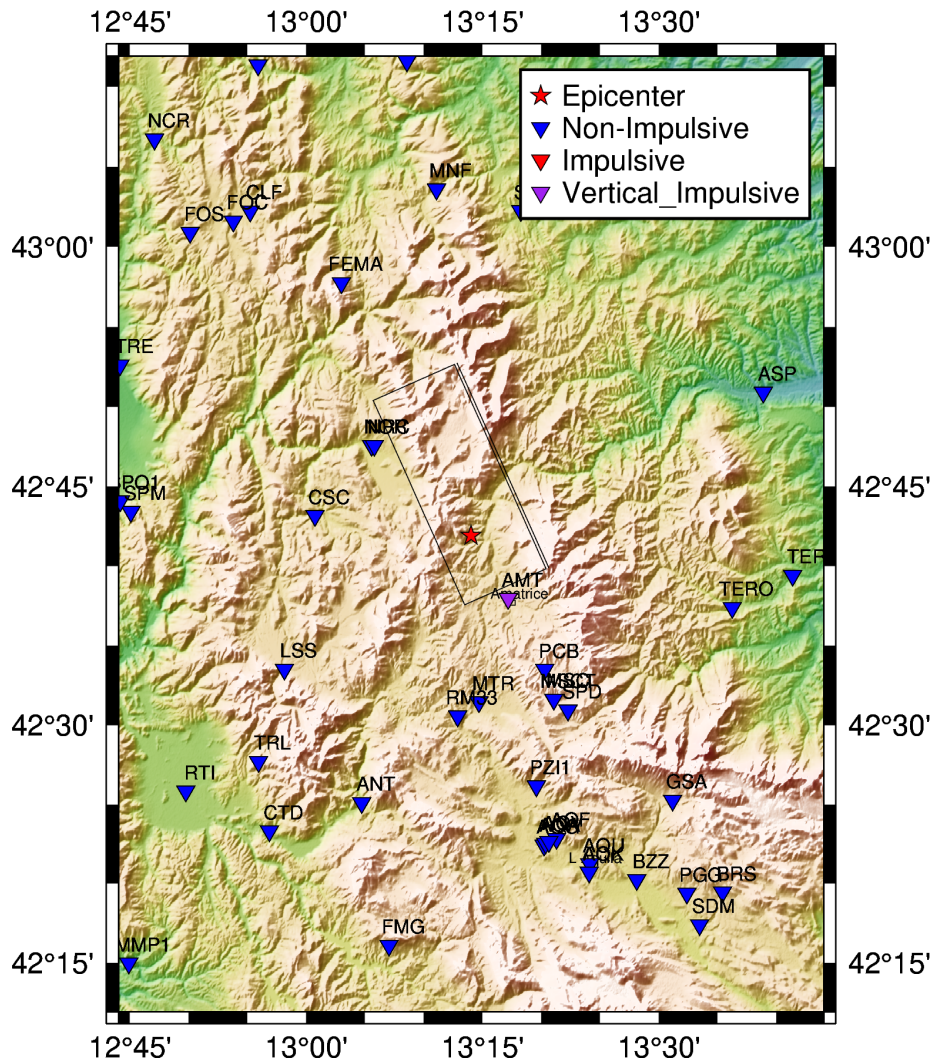

### 2.10.3 Ertuncay and Costa

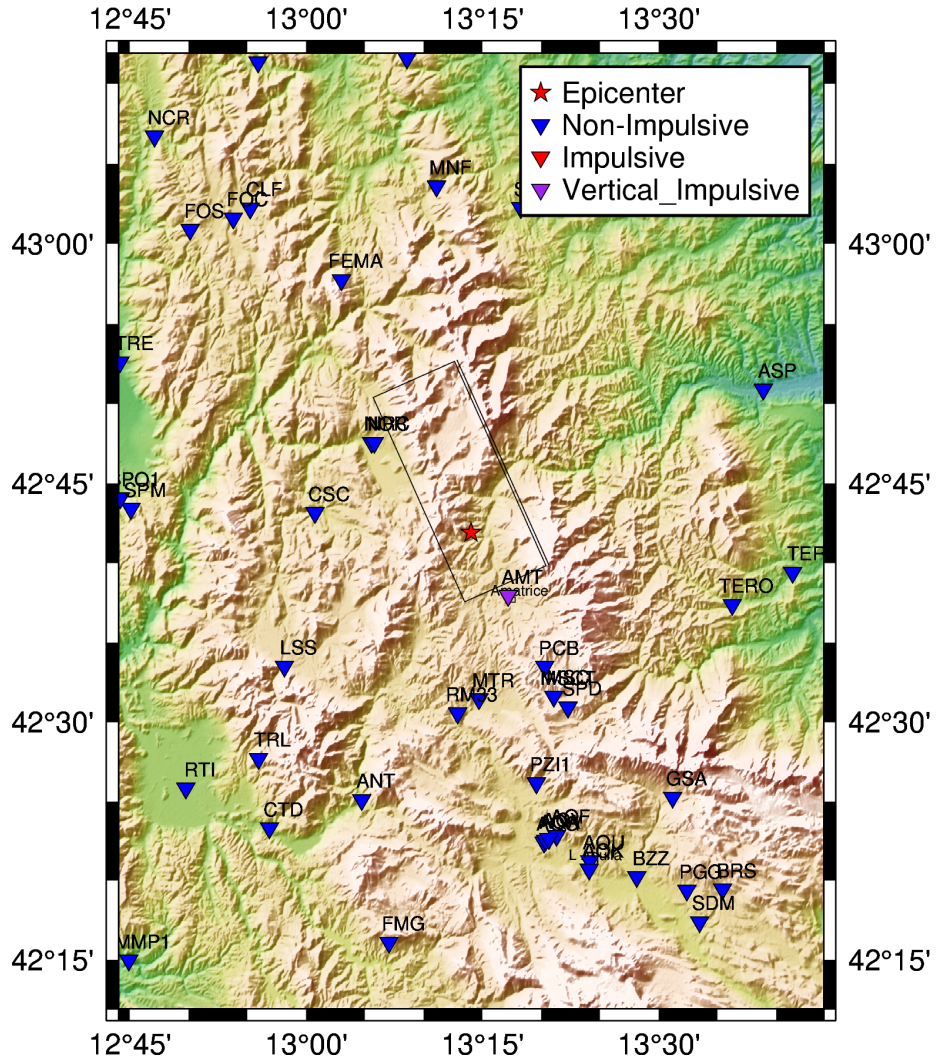

### 2.11.1 Shahi and Baker (2014)

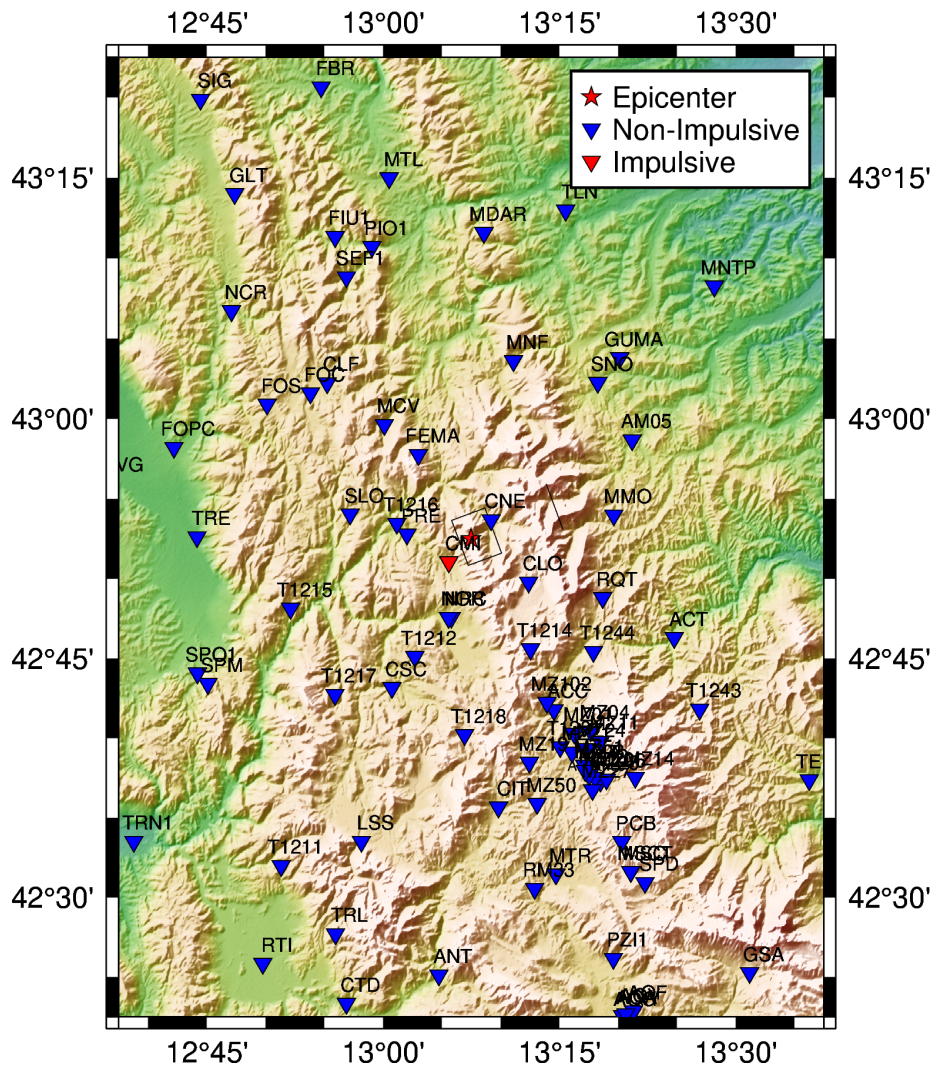

### 2.11.2 Chang et al. (2016)

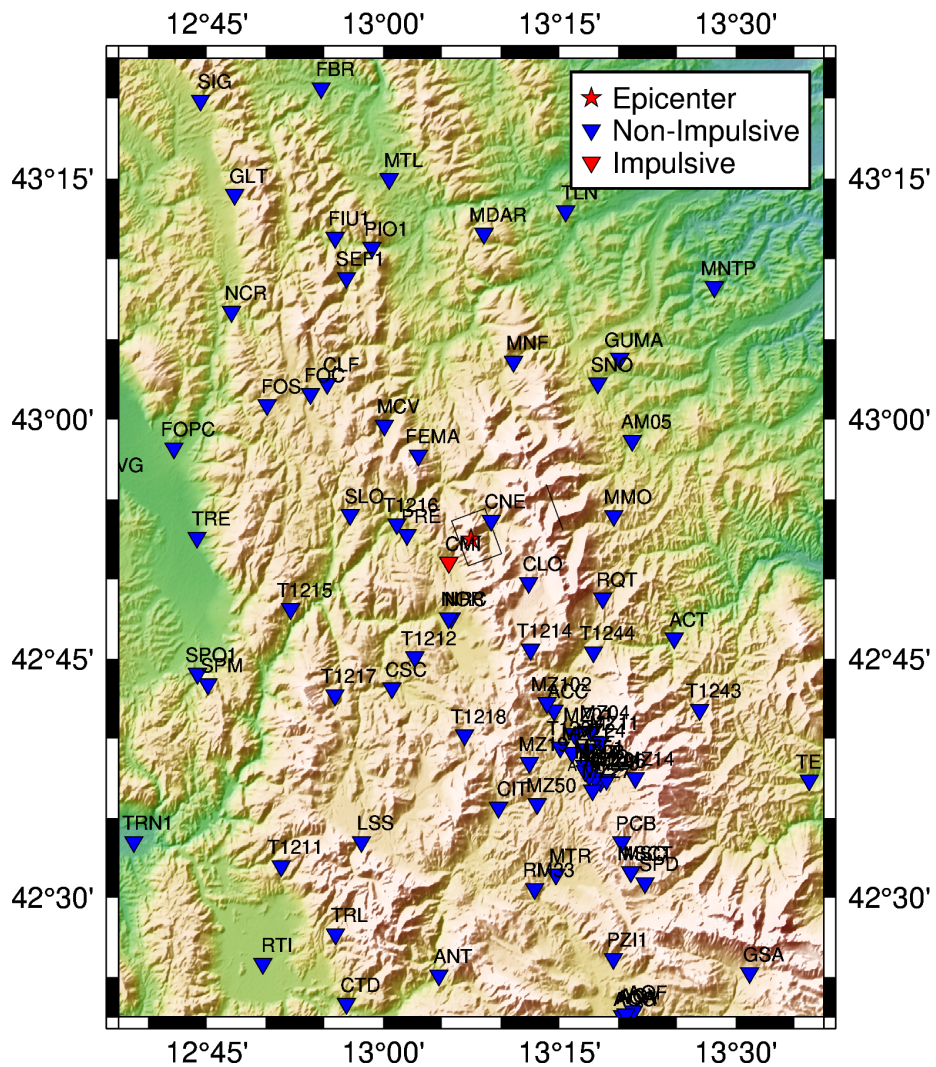

### 2.11.3 Ertuncay and Costa

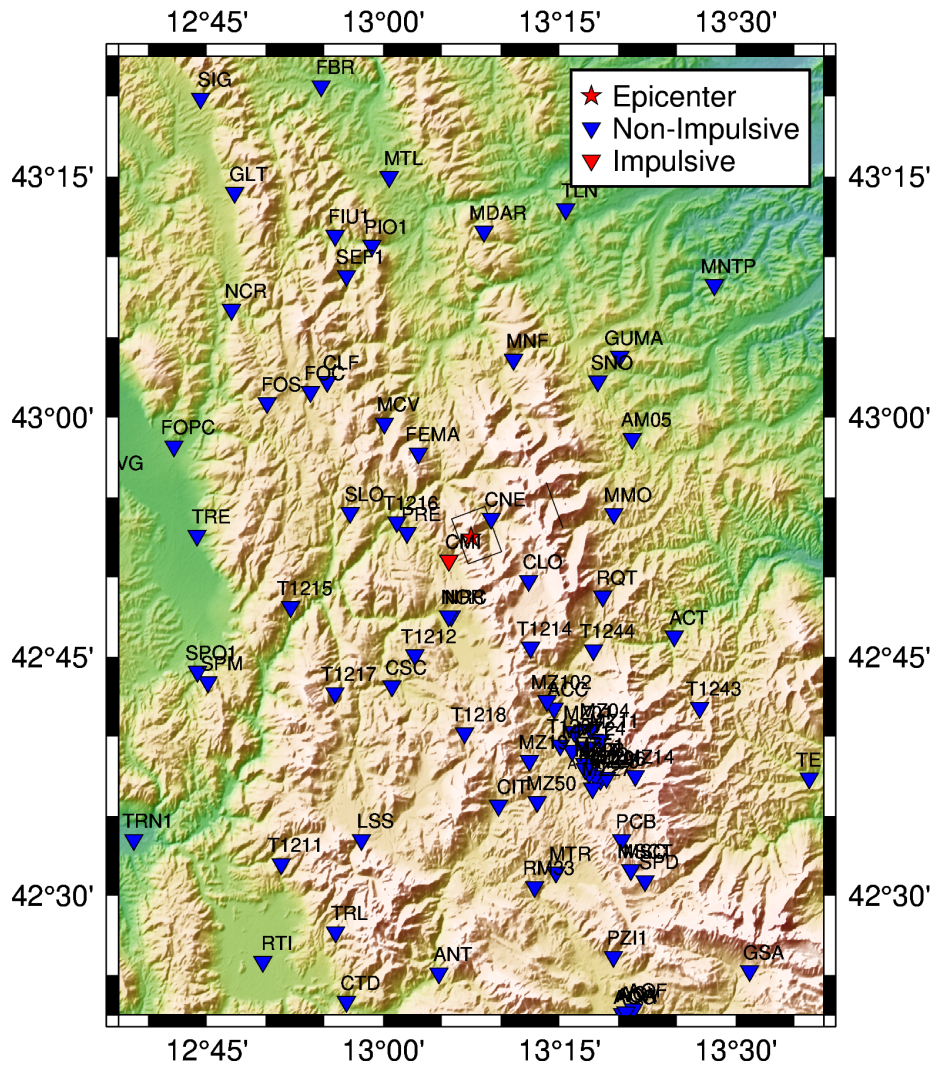

### 2.12.1 Shahi and Baker (2014)

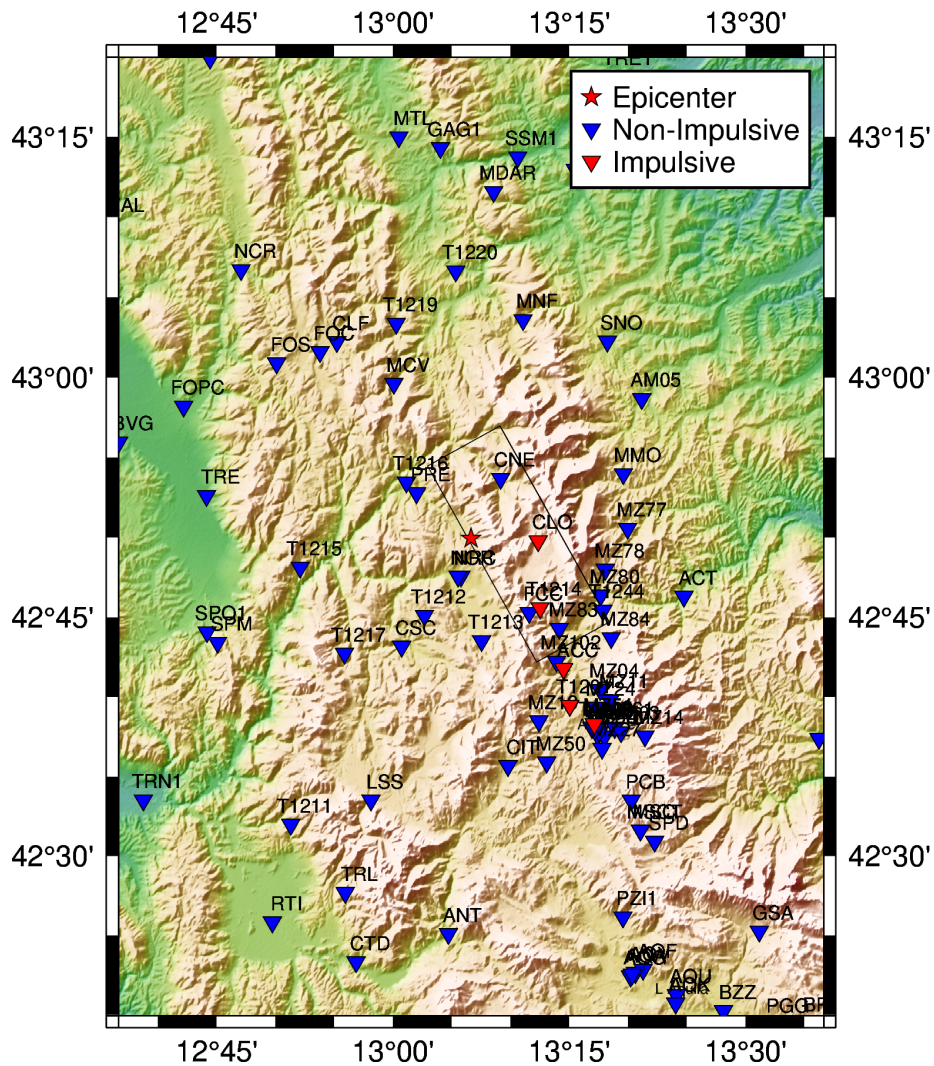

### 2.12.2 Chang et al. (2016)

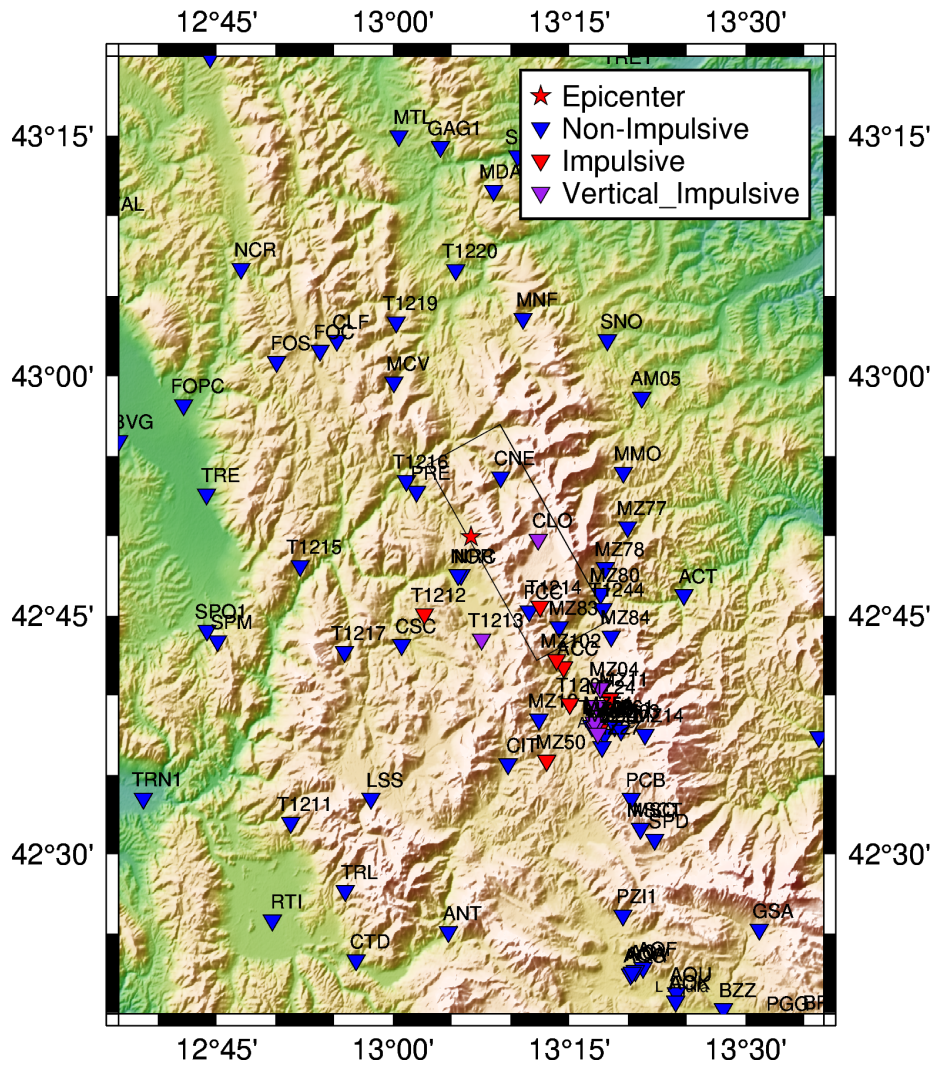

### 2.12.3 Ertuncay and Costa (2019)

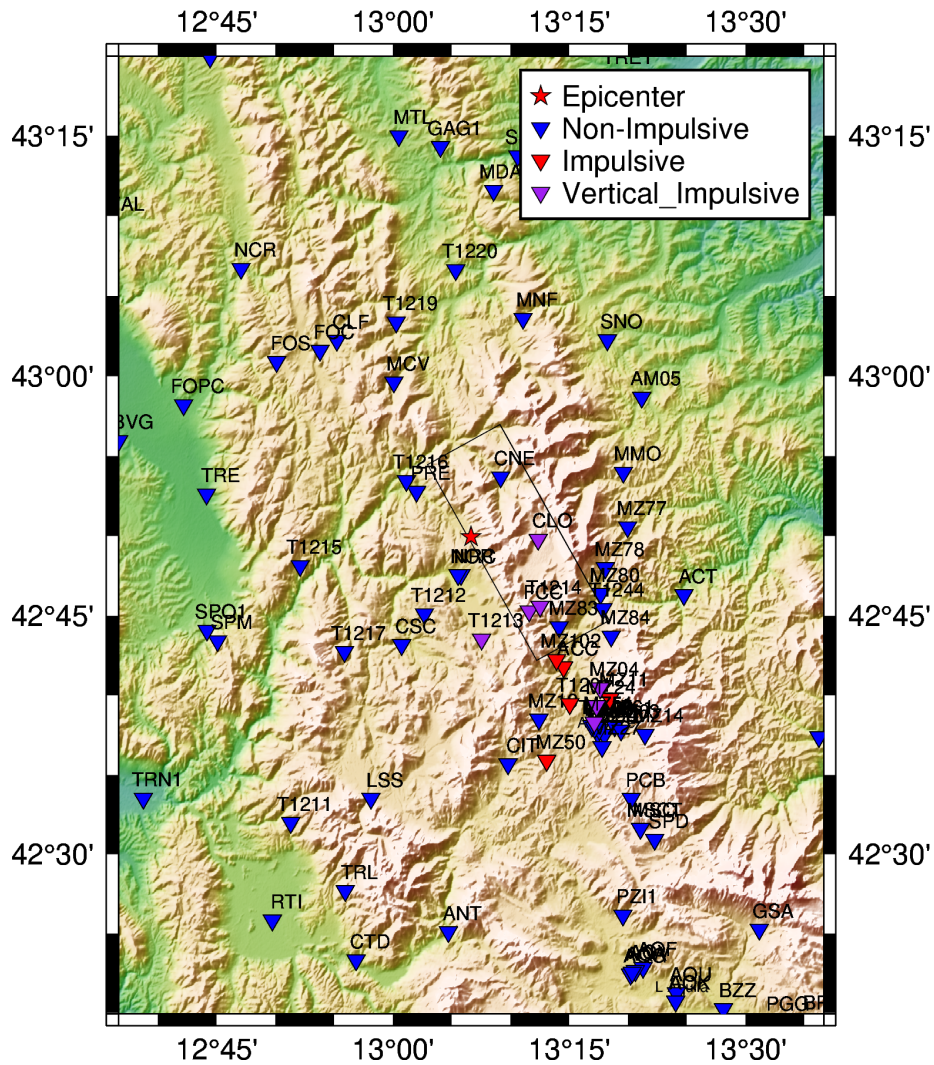

Supplement: s1 [file s1]
